# Supplementary material for: Identification of Epithelial Mesenchymal Transition-Related lncRNAs Associated with Prognosis and Tumor Immune Microenvironment of Hepatocellular Carcinoma
Source: Hindawi journal article supplement (doi:10.1155/2022/6335155), 2022-01-15
Supplement: f1 [file 6335155.f1.pdf]

| Gene        | Conmean     | Treatmean   | LogFC       | P-value     | FDR         |
|-------------|-------------|-------------|-------------|-------------|-------------|
| SNHG15      | 0.907477468 | 1.884031771 | 1.053889566 | 8.83E-06    | 1.22E-05    |
| AL354733.3  | 0.26252006  | 0.553279036 | 1.075579593 | 0.001074475 | 0.00128661  |
| MUC12-AS1   | 0.061443122 | 0.620857376 | 3.336938462 | 0.000339021 | 0.000420815 |
| AC006042.1  | 0.15682245  | 0.648315566 | 2.047564105 | 4.47E-09    | 7.77E-09    |
| VPS13B-DT   | 0.732605134 | 2.321344405 | 1.663852867 | 4.04E-15    | 1.29E-14    |
| AP006621.2  | 0.246960162 | 1.609353969 | 2.704131436 | 1.54E-16    | 5.87E-16    |
| THUMPD3-AS1 | 0.417552991 | 1.434057606 | 1.780071775 | 6.85E-25    | 2.22E-23    |
| AC025265.1  | 0.154723189 | 0.565949461 | 1.870983789 | 4.97E-12    | 1.15E-11    |
| AC022613.1  | 1.232899851 | 3.891621353 | 1.658315732 | 8.41E-08    | 1.31E-07    |
| AL451165.2  | 2.105298574 | 4.605082112 | 1.12920203  | 6.73E-12    | 1.54E-11    |
| AL359513.1  | 0.120213997 | 0.575207539 | 2.258477702 | 4.98E-17    | 2.01E-16    |
| LINC02428   | 10.75336732 | 4.042470966 | -1.41147918 | 4.04E-17    | 1.66E-16    |
| AC005586.1  | 0.291504936 | 0.867053709 | 1.572601052 | 8.31E-13    | 2.07E-12    |
| MYLK-AS1    | 0.097408552 | 0.699673579 | 2.844561674 | 7.53E-27    | 9.41E-25    |
| LINC00942   | 0.006149974 | 1.555603151 | 7.982678041 | 1.01E-08    | 1.70E-08    |
| LINC00886   | 0.431780399 | 1.150869243 | 1.414354273 | 4.27E-05    | 5.66E-05    |
| AL355353.2  | 1.183043683 | 2.465144557 | 1.059168904 | 0.000335526 | 0.00041717  |
| ZNF529-AS1  | 0.29410918  | 0.914214179 | 1.636180378 | 1.19E-20    | 9.18E-20    |
| ZNF213-AS1  | 0.499615116 | 1.26714217  | 1.342689369 | 9.14E-21    | 7.34E-20    |
| LINC00896   | 0.094482152 | 0.652228846 | 2.787264514 | 7.72E-11    | 1.63E-10    |
| AC073611.1  | 0.204748851 | 0.73300742  | 1.839972443 | 1.15E-18    | 5.83E-18    |
| AL135905.1  | 1.398505436 | 3.803966156 | 1.443618548 | 4.80E-12    | 1.11E-11    |
| TAT-AS1     | 0.427066045 | 0.881869218 | 1.046105521 | 0.009453748 | 0.010849994 |
| DANCR       | 4.42437974  | 11.78658525 | 1.413598688 | 4.06E-09    | 7.10E-09    |
| AL645933.3  | 0.712655894 | 1.569219832 | 1.13876993  | 1.98E-08    | 3.26E-08    |
| SNHG12      | 0.473602196 | 1.811266972 | 1.935251534 | 7.10E-22    | 8.41E-21    |
| LINC01139   | 0.035455534 | 0.881145753 | 4.635297951 | 0.04486599  | 0.049365824 |
| AC093673.1  | 3.16342621  | 7.333990174 | 1.213110389 | 2.10E-11    | 4.63E-11    |
| AC005586.2  | 0.25121224  | 0.582298627 | 1.212852456 | 1.09E-06    | 1.61E-06    |
| LINC01942   | 0.68969465  | 1.450846176 | 1.072864887 | 2.74E-06    | 3.90E-06    |
| LNCTAM34A   | 0.31955671  | 0.918124894 | 1.52261844  | 9.60E-15    | 2.94E-14    |
| SNHG8       | 19.47856064 | 40.22251932 | 1.046116373 | 2.53E-11    | 5.53E-11    |
| AL161669.3  | 0.361577441 | 1.433956836 | 1.987625024 | 5.16E-15    | 1.62E-14    |
| TMPO-AS1    | 0.223927634 | 1.15424192  | 2.36584115  | 1.34E-23    | 2.70E-22    |
| MAN1B1-DT   | 0.292326951 | 0.618133133 | 1.080334753 | 1.54E-09    | 2.80E-09    |
| AL139384.1  | 0.539316853 | 1.44040913  | 1.417273626 | 1.21E-14    | 3.66E-14    |
| AZIN1-AS1   | 0.249968357 | 0.644121722 | 1.365587867 | 4.11E-12    | 9.61E-12    |
| AC112491.1  | 0.980105964 | 1.973377868 | 1.009657594 | 0.001643111 | 0.001942569 |
| AC068987.3  | 0.268474978 | 1.605062914 | 2.579770308 | 5.60E-14    | 1.55E-13    |
| AC010547.2  | 2.315825053 | 1.13197425  | -1.03268513 | 5.12E-24    | 1.16E-22    |
| AC016405.3  | 0.210645307 | 0.929251079 | 2.141252683 | 3.03E-12    | 7.17E-12    |
| AL606489.1  | 0.055938465 | 0.834341378 | 3.898725219 | 8.23E-24    | 1.80E-22    |
| ZSCAN16-AS  | 3.443201204 | 7.500916206 | 1.123316338 | 1.64E-12    | 3.99E-12    |

|             |             |             |              |             |             |
|-------------|-------------|-------------|--------------|-------------|-------------|
| AC009407.1  | 3.991087935 | 10.44650534 | 1.388166428  | 3.63E-09    | 6.37E-09    |
| AC090589.3  | 0.359481951 | 0.77462497  | 1.10757867   | 5.67E-08    | 9.04E-08    |
| ZFPM2-AS1   | 0.053864775 | 1.493454266 | 4.793167127  | 1.20E-08    | 2.02E-08    |
| AC012510.1  | 0.287810868 | 0.949093298 | 1.721428846  | 8.56E-17    | 3.36E-16    |
| RAB30-DT    | 1.130121368 | 2.478681231 | 1.133095029  | 2.14E-18    | 1.04E-17    |
| AC011468.1  | 0.290868174 | 1.169254251 | 2.00715132   | 8.44E-19    | 4.37E-18    |
| LINC01671   | 0.162632608 | 0.682321854 | 2.068835879  | 0.021908058 | 0.024613571 |
| AL355102.4  | 0.350581938 | 2.513657844 | 2.841964709  | 2.42E-05    | 3.27E-05    |
| ZNF710-AS1  | 0.840688865 | 1.757579949 | 1.063946447  | 2.47E-05    | 3.31E-05    |
| ASMTL-AS1   | 0.607834089 | 2.796766678 | 2.202010408  | 1.22E-20    | 9.30E-20    |
| AC020765.2  | 0.257707804 | 0.923856849 | 1.8419331    | 4.11E-19    | 2.36E-18    |
| AC015982.2  | 0.464077292 | 0.946197579 | 1.027776363  | 1.55E-10    | 3.16E-10    |
| AC007099.1  | 0.013202506 | 0.612755784 | 5.53642849   | 1.02E-07    | 1.57E-07    |
| AL031673.1  | 0.495193713 | 1.843383067 | 1.896291001  | 2.06E-19    | 1.25E-18    |
| SNHG32      | 9.754471395 | 36.20809294 | 1.892176594  | 3.75E-25    | 1.33E-23    |
| RUSC1-AS1   | 0.286732541 | 1.654774681 | 2.528857237  | 1.14E-24    | 3.27E-23    |
| AC008771.1  | 1.045183744 | 2.529413913 | 1.275046548  | 5.02E-19    | 2.82E-18    |
| CRIM1-DT    | 0.851885881 | 3.148073329 | 1.885737063  | 0.000111587 | 0.00014303  |
| LINC01004   | 0.201822868 | 0.842962097 | 2.062378109  | 2.09E-22    | 2.68E-21    |
| DLG5-AS1    | 0.179581964 | 1.38573567  | 2.947937721  | 1.56E-23    | 2.94E-22    |
| MUC20-OT1   | 0.327767438 | 0.844240262 | 1.364981095  | 5.80E-18    | 2.62E-17    |
| AP000894.4  | 0.374368665 | 1.259622347 | 1.750459666  | 3.26E-13    | 8.46E-13    |
| ZEB1-AS1    | 0.274887624 | 0.805408081 | 1.550877991  | 3.63E-22    | 4.44E-21    |
| ZNF503-AS2  | 0.411786638 | 1.040383029 | 1.337145847  | 1.67E-17    | 7.11E-17    |
| AL445524.1  | 1.830088172 | 12.66057767 | 2.79035817   | 8.48E-26    | 4.52E-24    |
| AL354836.1  | 0.487700152 | 1.496240045 | 1.617275321  | 2.75E-15    | 8.89E-15    |
| AP002748.4  | 0.545956334 | 1.294132466 | 1.245127826  | 2.48E-14    | 7.21E-14    |
| lnc-CCNY-1  | 0.237875227 | 0.826470642 | 1.79675854   | 5.49E-19    | 3.01E-18    |
| ZNF793-AS1  | 0.100200451 | 0.571154517 | 2.510992099  | 0.00059752  | 0.000727162 |
| FAM99B      | 3.774539922 | 1.807265988 | -1.062491952 | 1.03E-14    | 3.13E-14    |
| AC009022.1  | 0.334901519 | 0.709270635 | 1.082599299  | 1.28E-10    | 2.63E-10    |
| AL162413.1  | 0.011029778 | 4.245629257 | 8.588430832  | 3.05E-09    | 5.40E-09    |
| AL035071.1  | 0.803632974 | 1.998842698 | 1.314556275  | 6.45E-15    | 2.01E-14    |
| AC012146.1  | 0.325398415 | 1.504259026 | 2.208773882  | 3.99E-20    | 2.81E-19    |
| AC009275.1  | 0.087307501 | 0.733148381 | 3.069927708  | 1.02E-08    | 1.72E-08    |
| AP001372.2  | 0.554062806 | 1.199577983 | 1.114405521  | 1.22E-15    | 4.10E-15    |
| AL358472.2  | 0.389858988 | 0.892931563 | 1.195597213  | 4.37E-16    | 1.61E-15    |
| AC139530.1  | 0.504626935 | 1.532106419 | 1.60222739   | 9.25E-21    | 7.34E-20    |
| AC022424.1  | 0.008662141 | 0.788275526 | 6.50783245   | 1.47E-07    | 2.24E-07    |
| AL354892.2  | 1.056558067 | 2.284709004 | 1.112638367  | 8.24E-08    | 1.28E-07    |
| KCNMB2-AS1  | 0.017109487 | 0.749220675 | 5.452522275  | 1.26E-14    | 3.79E-14    |
| MID1IP1-AS1 | 0.322095583 | 1.010145552 | 1.649002403  | 2.55E-09    | 4.56E-09    |
| NOP14-AS1   | 0.508030851 | 1.086812758 | 1.09711539   | 4.54E-21    | 4.40E-20    |
| C2-AS1      | 0.245821627 | 0.62803762  | 1.35323913   | 6.06E-08    | 9.57E-08    |

|            |             |             |             |             |             |
|------------|-------------|-------------|-------------|-------------|-------------|
| AC068888.1 | 0.742697028 | 1.509608604 | 1.02332884  | 1.96E-10    | 3.92E-10    |
| BX322562.1 | 0.793129214 | 2.019644165 | 1.348473302 | 0.016541561 | 0.018696976 |
| SNHG19     | 10.30830584 | 26.11049965 | 1.340822818 | 1.57E-06    | 2.28E-06    |
| AL121899.1 | 0.318121081 | 2.390599329 | 2.909724465 | 1.11E-19    | 7.07E-19    |
| AC007773.1 | 0.137650204 | 0.707799145 | 2.362333274 | 4.93E-18    | 2.26E-17    |
| LINC02298  | 0.129878478 | 0.703708669 | 2.437815901 | 8.98E-05    | 0.000116145 |
| PARD3-AS1  | 0.210160208 | 0.590742124 | 1.491038959 | 1.97E-08    | 3.24E-08    |
| AC145207.5 | 0.195688849 | 0.684147936 | 1.805746768 | 4.30E-19    | 2.45E-18    |
| AC087741.1 | 0.184839988 | 0.716305268 | 1.954297649 | 6.13E-19    | 3.34E-18    |
| AC024075.1 | 0.17466264  | 0.54990291  | 1.654605872 | 5.20E-10    | 1.00E-09    |
| AC022144.1 | 0.523767162 | 1.218032614 | 1.217555247 | 0.000648466 | 0.000787876 |
| AL360181.2 | 0.334574234 | 0.846638556 | 1.339419844 | 5.23E-10    | 1.00E-09    |
| AC027644.3 | 1.313398687 | 2.823768982 | 1.104317145 | 8.82E-08    | 1.36E-07    |
| LINC00513  | 0.157960865 | 0.647674503 | 2.035701779 | 5.61E-07    | 8.30E-07    |
| BAIAP2-DT  | 1.719264129 | 4.877977405 | 1.504491874 | 8.92E-19    | 4.59E-18    |
| SNHG10     | 0.455101749 | 1.518934279 | 1.738798413 | 1.56E-23    | 2.94E-22    |
| AC004687.1 | 0.196520938 | 0.638454567 | 1.69990093  | 1.53E-06    | 2.23E-06    |
| STPG3-AS1  | 0.13922199  | 0.774310088 | 2.475524334 | 2.17E-14    | 6.33E-14    |
| SNHG29     | 18.16455582 | 37.66017102 | 1.051913464 | 5.89E-08    | 9.37E-08    |
| AC023043.4 | 0.252394816 | 0.890744932 | 1.819330092 | 6.65E-13    | 1.68E-12    |
| MAP3K2-DT  | 0.419094722 | 1.008296499 | 1.266571682 | 1.30E-09    | 2.42E-09    |
| AC027307.2 | 2.892197113 | 8.621630507 | 1.575794855 | 4.19E-24    | 9.77E-23    |
| KMT2E-AS1  | 2.387686128 | 5.900016388 | 1.305105761 | 1.52E-13    | 4.04E-13    |
| BX537318.1 | 0.477849217 | 1.42375841  | 1.575077005 | 6.92E-21    | 6.00E-20    |
| AC020915.3 | 0.384037725 | 1.193137149 | 1.635439946 | 1.47E-22    | 1.92E-21    |
| AL356234.2 | 0.053979861 | 0.826058104 | 3.935750086 | 7.62E-14    | 2.06E-13    |
| AL392172.1 | 1.848659659 | 5.774382711 | 1.643187082 | 2.30E-21    | 2.42E-20    |
| CCDC18-AS1 | 0.248727066 | 1.024183795 | 2.041839226 | 6.26E-23    | 9.34E-22    |
| AC138696.2 | 0.586640336 | 2.541743588 | 2.115270322 | 2.28E-20    | 1.65E-19    |
| MINCR      | 0.769633169 | 3.339484281 | 2.117382441 | 5.23E-21    | 4.70E-20    |
| RPARP-AS1  | 0.721190597 | 1.489844335 | 1.046709108 | 4.39E-14    | 1.23E-13    |
| AC103691.1 | 0.443404798 | 0.929335187 | 1.067574651 | 8.70E-08    | 1.35E-07    |
| LINC00685  | 0.125698582 | 0.870312455 | 2.791565069 | 3.60E-23    | 5.72E-22    |
| AL139287.1 | 0.856954718 | 2.656585584 | 1.632282313 | 2.35E-21    | 2.44E-20    |
| ALDH1L1-AS | 0.319395703 | 0.689546531 | 1.110303003 | 0.003118008 | 0.003640116 |
| AC040977.1 | 1.058995171 | 3.028163359 | 1.515747025 | 3.00E-18    | 1.42E-17    |
| CYTOR      | 0.722748445 | 4.130731915 | 2.514831927 | 8.43E-21    | 6.98E-20    |
| AC115618.2 | 2.291424543 | 4.702419198 | 1.037158376 | 5.94E-11    | 1.29E-10    |
| MELTF-AS1  | 0.112246069 | 0.96102527  | 3.097909452 | 7.08E-21    | 6.07E-20    |
| SNHG1      | 1.243861057 | 6.041753795 | 2.280142053 | 4.47E-26    | 3.03E-24    |
| AC104113.1 | 0.486284395 | 1.070232158 | 1.138051584 | 9.24E-12    | 2.08E-11    |
| GPRC5D-AS1 | 0.401210526 | 0.934750913 | 1.220222518 | 1.66E-19    | 1.03E-18    |
| LINC01857  | 0.259607692 | 0.534094749 | 1.040762573 | 0.000205374 | 0.000259236 |
| AC010331.1 | 0.119087887 | 0.606362044 | 2.348152775 | 7.63E-22    | 8.76E-21    |

|            |             |             |              |             |             |
|------------|-------------|-------------|--------------|-------------|-------------|
| AC005332.4 | 0.232729234 | 0.563754692 | 1.276415089  | 1.78E-11    | 3.96E-11    |
| AC000123.1 | 0.433409077 | 0.959739735 | 1.146913854  | 1.65E-12    | 4.01E-12    |
| AL035461.3 | 0.370122689 | 2.059543869 | 2.476249373  | 6.52E-20    | 4.38E-19    |
| AL022328.2 | 0.734639296 | 2.099015186 | 1.514604631  | 6.21E-17    | 2.48E-16    |
| CAMTA1-DT  | 0.242565786 | 0.593917673 | 1.291886893  | 1.16E-07    | 1.78E-07    |
| AL118516.1 | 1.739652845 | 3.558272014 | 1.032377363  | 2.12E-10    | 4.22E-10    |
| AC132872.1 | 0.521036339 | 1.942457047 | 1.898426798  | 1.87E-23    | 3.41E-22    |
| SREBF2-AS1 | 0.190006441 | 0.929223494 | 2.289977308  | 2.58E-26    | 2.14E-24    |
| AC147067.1 | 0.332910613 | 0.811312853 | 1.285123482  | 1.07E-05    | 1.47E-05    |
| AC091271.1 | 0.670871395 | 1.479531876 | 1.141032644  | 2.30E-08    | 3.75E-08    |
| AC020978.4 | 4.697383269 | 2.171596055 | -1.113101543 | 1.64E-15    | 5.36E-15    |
| AC124016.3 | 0.256977606 | 0.622836289 | 1.27721036   | 6.96E-07    | 1.03E-06    |
| FAM111A-DT | 0.27312099  | 0.698282152 | 1.354269903  | 7.48E-17    | 2.97E-16    |
| AL022328.1 | 0.317448984 | 0.790558033 | 1.31634661   | 1.97E-11    | 4.35E-11    |
| TMEM147-AS | 0.183057555 | 0.685394666 | 1.904637648  | 3.38E-22    | 4.20E-21    |
| AC012313.1 | 0.60987427  | 1.304764514 | 1.097205693  | 9.70E-17    | 3.77E-16    |
| AP000424.2 | 0.121326288 | 0.591554043 | 2.285617805  | 0.001875354 | 0.002206647 |
| NCK1-DT    | 0.636228195 | 1.416333768 | 1.154545072  | 2.25E-19    | 1.36E-18    |
| AL158071.3 | 0.203915659 | 0.619442837 | 1.602998591  | 3.73E-10    | 7.28E-10    |
| AL928654.2 | 0.307820723 | 0.916629928 | 1.57424903   | 9.11E-12    | 2.07E-11    |
| AC019117.2 | 0.2460559   | 0.899712611 | 1.870478137  | 0.000428647 | 0.000526806 |
| AC068473.5 | 0.41929234  | 1.157337812 | 1.464781652  | 1.80E-18    | 8.89E-18    |
| SNHG7      | 1.412275112 | 6.609582744 | 2.226538045  | 1.87E-24    | 4.98E-23    |
| CR936218.2 | 0.312460611 | 0.861486557 | 1.463153953  | 0.001408095 | 0.001678017 |
| LINC00957  | 0.319172783 | 0.731721487 | 1.19695699   | 3.95E-08    | 6.36E-08    |
| CD2BP2-DT  | 1.001605303 | 2.272651853 | 1.182062589  | 7.14E-12    | 1.63E-11    |
| LINC01963  | 0.28627718  | 0.853750498 | 1.576401839  | 9.60E-15    | 2.94E-14    |
| AC015813.1 | 0.209154727 | 0.796465338 | 1.92904097   | 6.08E-17    | 2.44E-16    |
| AL023803.1 | 0.581269117 | 1.525726291 | 1.392218007  | 2.43E-05    | 3.27E-05    |
| AC006504.7 | 0.20183604  | 0.729382202 | 1.853491191  | 7.10E-16    | 2.53E-15    |
| APTR       | 1.110511786 | 2.650321923 | 1.254942903  | 1.32E-22    | 1.75E-21    |
| LINC00106  | 0.374020238 | 1.643099847 | 2.13523191   | 1.20E-15    | 4.04E-15    |
| SNHG9      | 3.260920702 | 9.528414378 | 1.546956797  | 1.33E-10    | 2.73E-10    |
| TAF1A-AS1  | 0.747174453 | 1.499026046 | 1.004508417  | 1.23E-09    | 2.30E-09    |
| AC008267.5 | 2.828380459 | 6.126456751 | 1.115076732  | 6.67E-11    | 1.43E-10    |
| AC009065.9 | 0.518518145 | 1.219768723 | 1.234141249  | 5.97E-15    | 1.87E-14    |
| AC008610.1 | 0.197255472 | 1.030346752 | 2.384992713  | 9.02E-19    | 4.61E-18    |
| AL161668.4 | 6.377864747 | 2.548529989 | -1.323408174 | 4.74E-16    | 1.73E-15    |
| AC026462.3 | 1.320374487 | 3.736760486 | 1.500840927  | 5.91E-05    | 7.74E-05    |
| EIF3J-DT   | 0.46914957  | 1.015647739 | 1.114280267  | 7.32E-16    | 2.57E-15    |
| PURPL      | 0.08166707  | 0.662927988 | 3.02102579   | 2.02E-08    | 3.33E-08    |
| LINC01980  | 0.0056925   | 1.764768061 | 8.276200571  | 2.59E-08    | 4.21E-08    |
| MIR210HG   | 0.439850653 | 1.419384255 | 1.690179548  | 0.000416062 | 0.000512182 |
| OTUD6B-AS1 | 1.621410083 | 3.280372408 | 1.016610588  | 3.27E-18    | 1.53E-17    |

|                        |             |             |              |             |             |
|------------------------|-------------|-------------|--------------|-------------|-------------|
| AC016394.2             | 0.13096983  | 0.71975928  | 2.458279967  | 1.09E-25    | 5.06E-24    |
| AL031058.1             | 2.064091804 | 4.936446885 | 1.257965866  | 3.36E-05    | 4.47E-05    |
| AC009237.14            | 1.338442687 | 3.017227212 | 1.172667979  | 1.64E-15    | 5.36E-15    |
| AC010761.1             | 0.219843321 | 0.749768758 | 1.769970009  | 8.80E-18    | 3.91E-17    |
| AP001505.1             | 1.278711791 | 3.855313685 | 1.592157117  | 1.77E-12    | 4.28E-12    |
| AC132872.3             | 0.248567626 | 0.632864137 | 1.348257405  | 1.93E-09    | 3.48E-09    |
| AC022150.2             | 0.203157308 | 0.54793805  | 1.431415532  | 0.000316916 | 0.00039469  |
| AC083880.1             | 0.202428576 | 0.676264462 | 1.740174576  | 1.55E-14    | 4.62E-14    |
| AC016888.1             | 2.416702281 | 6.058207816 | 1.325851313  | 2.70E-12    | 6.46E-12    |
| LINC01003              | 0.851390262 | 2.042197408 | 1.262229837  | 6.21E-15    | 1.94E-14    |
| AL359643.3             | 0.336933172 | 0.836039018 | 1.311107801  | 3.18E-14    | 9.09E-14    |
| AC079305.2             | 0.147634218 | 0.583040348 | 1.981568585  | 1.24E-07    | 1.89E-07    |
| MAPKAPK5- <sub>L</sub> | 1.350741717 | 3.967566979 | 1.554502744  | 8.83E-27    | 9.41E-25    |
| AC004540.2             | 1.749295683 | 0.567111353 | -1.625070225 | 8.08E-20    | 5.33E-19    |
| AP000593.3             | 0.023459695 | 1.496655086 | 5.995413725  | 1.27E-10    | 2.62E-10    |
| AP000254.2             | 1.254763166 | 2.521725257 | 1.006996018  | 6.47E-13    | 1.64E-12    |
| LINC02806              | 0.001134756 | 0.717886145 | 9.305229585  | 1.17E-15    | 3.98E-15    |
| AC060780.1             | 0.228524645 | 0.809819415 | 1.825250474  | 2.87E-12    | 6.85E-12    |
| SNHG14                 | 0.211368991 | 0.637834183 | 1.593417677  | 0.006128952 | 0.007066767 |
| AL589765.4             | 0.366775304 | 1.161204531 | 1.662653701  | 3.10E-14    | 8.94E-14    |
| AC087482.1             | 6.581079093 | 16.04875691 | 1.286065489  | 1.73E-09    | 3.12E-09    |
| AC027796.4             | 0.106293957 | 0.583389064 | 2.456398756  | 1.25E-17    | 5.46E-17    |
| LINC00221              | 0.00271213  | 1.104430429 | 8.669660654  | 1.59E-07    | 2.40E-07    |
| AL391427.1             | 0.333895911 | 1.418698148 | 2.087097334  | 1.39E-11    | 3.12E-11    |
| LINC00665              | 0.119604438 | 1.405468455 | 3.55470824   | 1.62E-10    | 3.29E-10    |
| PTOV1-AS2              | 0.453242904 | 1.556879788 | 1.780301217  | 2.66E-18    | 1.27E-17    |
| SNHG11                 | 1.670991329 | 5.161074219 | 1.626967131  | 3.39E-23    | 5.62E-22    |
| PPP1R14B-AS            | 0.292719134 | 1.214101557 | 2.052300145  | 1.39E-14    | 4.15E-14    |
| AL121832.2             | 0.77911471  | 2.727053058 | 1.807435111  | 1.49E-19    | 9.40E-19    |
| AC005920.4             | 0.458070454 | 1.228888707 | 1.423712851  | 0.00037545  | 0.000464487 |
| AC010542.6             | 0.236220316 | 0.873335255 | 1.88640253   | 1.17E-18    | 5.92E-18    |
| HEIH                   | 5.341753754 | 12.86642167 | 1.268225499  | 2.07E-24    | 5.32E-23    |
| AC107375.1             | 0.162585019 | 0.732006964 | 2.170663042  | 9.91E-26    | 4.93E-24    |
| AL391056.1             | 0.0226113   | 0.671633212 | 4.892557719  | 1.40E-07    | 2.13E-07    |
| FOXD2-AS1              | 0.225471947 | 1.579584669 | 2.808525422  | 5.05E-21    | 4.59E-20    |
| LINC01089              | 0.248189245 | 1.233952733 | 2.313774631  | 3.82E-26    | 2.85E-24    |
| AL355802.3             | 0.122381606 | 0.583838247 | 2.254181989  | 5.07E-20    | 3.54E-19    |
| LINC01436              | 0.088615483 | 1.690845234 | 4.254042011  | 5.70E-06    | 7.91E-06    |
| MAGI2-AS3              | 1.564101827 | 0.758725061 | -1.043685342 | 1.16E-13    | 3.10E-13    |
| AC092171.3             | 0.222339359 | 0.849430493 | 1.933732542  | 4.57E-18    | 2.12E-17    |
| AL591895.1             | 2.803405997 | 10.15936987 | 1.857558323  | 3.09E-21    | 3.11E-20    |
| AC074117.1             | 0.472669371 | 1.294549403 | 1.453546735  | 4.76E-21    | 4.50E-20    |
| LINC02163              | 0.001209671 | 1.021285824 | 9.721556245  | 1.64E-14    | 4.85E-14    |
| PVT1                   | 0.118649012 | 0.929566969 | 2.96985872   | 2.90E-20    | 2.08E-19    |

|             |             |             |             |             |             |
|-------------|-------------|-------------|-------------|-------------|-------------|
| AC125257.1  | 1.260417867 | 2.688781991 | 1.093050675 | 1.38E-21    | 1.47E-20    |
| AC008764.2  | 0.420982015 | 1.184436774 | 1.492370684 | 8.15E-11    | 1.71E-10    |
| RNASEH1-AS  | 1.30650646  | 2.769461051 | 1.083890991 | 9.79E-16    | 3.41E-15    |
| NRSN2-AS1   | 0.361432325 | 0.952883061 | 1.398573637 | 4.25E-12    | 9.92E-12    |
| AC009283.1  | 1.814617584 | 4.569689236 | 1.332430513 | 7.56E-19    | 4.00E-18    |
| CHKB-DT     | 0.521489299 | 1.286360627 | 1.302585601 | 2.63E-16    | 9.91E-16    |
| PANK2-AS1   | 0.235169892 | 0.654007651 | 1.475604144 | 4.43E-13    | 1.13E-12    |
| LINC01484   | 0.203282517 | 0.553471357 | 1.445022515 | 1.46E-09    | 2.66E-09    |
| GIHCG       | 0.389109542 | 1.925016018 | 2.306622187 | 3.99E-24    | 9.59E-23    |
| SNHG17      | 1.428560482 | 3.703285708 | 1.37424374  | 3.19E-16    | 1.20E-15    |
| ST8SIA6-AS1 | 0.025064855 | 2.103294092 | 6.390840914 | 1.88E-10    | 3.77E-10    |
| AC104825.1  | 0.409677311 | 0.97451432  | 1.250195392 | 1.07E-10    | 2.23E-10    |
| LINC00294   | 0.86222429  | 1.87437296  | 1.120272936 | 2.84E-18    | 1.35E-17    |
| AC006449.7  | 0.636534607 | 1.282470752 | 1.010615067 | 1.33E-09    | 2.47E-09    |
| AC006213.4  | 0.253244531 | 0.839264129 | 1.728593804 | 3.29E-10    | 6.49E-10    |
| AC084824.6  | 0.330473975 | 0.850634356 | 1.36400246  | 1.71E-15    | 5.55E-15    |
| AC015849.3  | 0.184326235 | 0.565450406 | 1.617139076 | 7.65E-10    | 1.46E-09    |
| AC111000.4  | 0.122344582 | 1.127003489 | 3.203469859 | 1.78E-17    | 7.53E-17    |
| RAD51-AS1   | 0.343280849 | 1.056517294 | 1.621855104 | 7.47E-20    | 4.97E-19    |
| AC024060.2  | 0.869129721 | 2.733276196 | 1.652987824 | 8.19E-23    | 1.17E-21    |
| POLR2J4     | 0.618527154 | 1.265251089 | 1.032514878 | 1.01E-16    | 3.91E-16    |
| MHENCN      | 1.642990436 | 4.408031555 | 1.423810469 | 4.83E-17    | 1.96E-16    |
| LINC01474   | 0.368580722 | 2.549065218 | 2.789915765 | 0.004541402 | 0.005260692 |
| AL031186.1  | 0.123074122 | 0.595767219 | 2.275221297 | 4.87E-21    | 4.54E-20    |
| AC005229.4  | 0.660627422 | 1.68163126  | 1.347952631 | 1.86E-19    | 1.14E-18    |
| AP000759.1  | 0.605085004 | 1.537360252 | 1.345245539 | 3.18E-14    | 9.09E-14    |
| AC074212.1  | 0.153294065 | 0.633311106 | 2.046612539 | 7.80E-23    | 1.14E-21    |
| BX284668.5  | 3.892016712 | 8.167326972 | 1.069346081 | 1.26E-08    | 2.12E-08    |
| AL391244.2  | 0.351645955 | 1.049788356 | 1.577902974 | 1.31E-20    | 9.87E-20    |
| AL355488.1  | 0.159005364 | 0.990814249 | 2.639539177 | 9.07E-25    | 2.71E-23    |
| AC008915.3  | 0.921069686 | 1.967003793 | 1.094617523 | 1.56E-15    | 5.19E-15    |
| AP003119.2  | 0.523414296 | 1.745231194 | 1.73739293  | 2.72E-08    | 4.41E-08    |
| AL160006.1  | 0.215474404 | 0.817242232 | 1.923247254 | 7.63E-22    | 8.76E-21    |
| GLIS2-AS1   | 0.474825944 | 1.679786897 | 1.82280755  | 4.05E-06    | 5.66E-06    |
| AL844908.2  | 0.221688181 | 0.550803821 | 1.313006711 | 1.09E-07    | 1.68E-07    |
| SBF2-AS1    | 0.233661797 | 0.755555693 | 1.693116224 | 3.38E-22    | 4.20E-21    |
| MIR4458HG   | 0.666210078 | 1.560526303 | 1.227983592 | 1.95E-09    | 3.50E-09    |
| AL118558.3  | 0.591829213 | 1.336730367 | 1.175455671 | 1.64E-12    | 3.99E-12    |
| ASH1L-AS1   | 0.294662667 | 0.774383771 | 1.393984432 | 5.26E-18    | 2.39E-17    |
| AC012645.1  | 0.260345118 | 0.666269675 | 1.355680876 | 2.71E-13    | 7.06E-13    |
| AL021707.6  | 0.447573723 | 1.213483787 | 1.438957589 | 5.47E-12    | 1.26E-11    |
| AC092535.5  | 1.036944631 | 6.471465378 | 2.641753567 | 7.00E-19    | 3.73E-18    |
| AC009686.2  | 0.171282346 | 0.670774825 | 1.969452082 | 7.12E-11    | 1.52E-10    |
| LINC01176   | 0.436530348 | 1.21068236  | 1.471666543 | 1.29E-15    | 4.33E-15    |

|             |             |             |              |             |             |
|-------------|-------------|-------------|--------------|-------------|-------------|
| AP003352.1  | 0.373764655 | 1.541082309 | 2.043741865  | 2.65E-23    | 4.49E-22    |
| C2CD4D-AS1  | 1.028418254 | 4.638335288 | 2.173179988  | 5.25E-19    | 2.92E-18    |
| AC242426.2  | 0.268882146 | 0.904868493 | 1.750734172  | 5.19E-20    | 3.59E-19    |
| AC099508.2  | 1.932978829 | 0.547204105 | -1.820674878 | 4.34E-19    | 2.45E-18    |
| AC026740.1  | 0.138208117 | 1.355019526 | 3.293399393  | 2.29E-19    | 1.37E-18    |
| AC022784.1  | 0.246774421 | 1.013012321 | 2.037386952  | 5.16E-07    | 7.69E-07    |
| LINC01006   | 0.91429656  | 2.080160882 | 1.185961015  | 1.01E-15    | 3.50E-15    |
| SNHG3       | 0.633348786 | 3.314609166 | 2.38776665   | 3.52E-23    | 5.70E-22    |
| AC004918.5  | 0.394433225 | 1.168577473 | 1.566900396  | 4.77E-18    | 2.20E-17    |
| AL355574.1  | 0.219372773 | 0.917609601 | 2.064496005  | 6.62E-19    | 3.55E-18    |
| SCAMP1-AS1  | 1.018731232 | 2.342763725 | 1.20143798   | 9.69E-20    | 6.29E-19    |
| AL512598.1  | 0.115340948 | 0.653987553 | 2.503358392  | 8.57E-09    | 1.46E-08    |
| DLGAP1-AS1  | 1.271828122 | 3.068001657 | 1.270395548  | 2.09E-10    | 4.17E-10    |
| MIR4435-2HC | 0.372212169 | 2.014476078 | 2.436207543  | 9.95E-23    | 1.40E-21    |
| AP002360.2  | 1.214584404 | 4.067104015 | 1.743539138  | 8.08E-19    | 4.24E-18    |
| AC013275.1  | 0.098836092 | 0.983149199 | 3.314300494  | 1.05E-07    | 1.62E-07    |
| LINC00847   | 2.098642201 | 4.264080715 | 1.022778526  | 3.39E-16    | 1.27E-15    |
| VPS9D1-AS1  | 0.293665732 | 0.823904833 | 1.488302779  | 1.16E-06    | 1.70E-06    |
| LINC02041   | 0.080913218 | 1.092878465 | 3.755613765  | 0.002728863 | 0.003195811 |
| PRRT3-AS1   | 0.442701121 | 1.74838108  | 1.981614738  | 2.87E-10    | 5.68E-10    |
| AC010883.1  | 0.422618433 | 1.250779865 | 1.565400302  | 6.47E-13    | 1.64E-12    |
| PSORS1C3    | 0.144937659 | 0.911937382 | 2.653502263  | 1.35E-09    | 2.49E-09    |
| AC106820.3  | 0.182073832 | 0.936767927 | 2.363168094  | 6.44E-19    | 3.48E-18    |
| AC136475.2  | 0.532915238 | 1.350710813 | 1.341740835  | 7.27E-13    | 1.83E-12    |
| AC026471.4  | 0.700185067 | 1.612986001 | 1.203925719  | 3.73E-14    | 1.06E-13    |
| AC016773.2  | 0.060701386 | 0.57856949  | 3.252688877  | 3.47E-25    | 1.33E-23    |
| LINC02604   | 0.686023799 | 1.567988833 | 1.192584754  | 3.43E-13    | 8.83E-13    |
| AC007038.1  | 0.177518717 | 0.604213336 | 1.767086879  | 3.11E-19    | 1.84E-18    |
| AC010326.3  | 1.238888332 | 2.959211182 | 1.256166502  | 4.83E-17    | 1.96E-16    |
| AC243964.3  | 0.76591208  | 1.811366639 | 1.241827894  | 1.96E-06    | 2.82E-06    |
| ARRDC1-AS1  | 1.527504804 | 3.569037691 | 1.22435822   | 8.45E-24    | 1.80E-22    |
| MMP25-AS1   | 0.293516831 | 0.729783568 | 1.314025434  | 3.40E-13    | 8.78E-13    |
| GAS5        | 6.02765298  | 33.72981137 | 2.484355984  | 3.75E-25    | 1.33E-23    |
| LINC01186   | 0.07648313  | 0.778008193 | 3.346571879  | 1.61E-14    | 4.78E-14    |
| AC132192.2  | 0.117528538 | 0.973848204 | 3.050685804  | 4.78E-28    | 3.46E-25    |
| AC007405.4  | 0.903435708 | 2.434416381 | 1.430082104  | 8.72E-15    | 2.69E-14    |
| HCP5        | 3.080273133 | 8.096910048 | 1.394313167  | 1.13E-09    | 2.13E-09    |
| AP002761.4  | 0.174445436 | 0.759199839 | 2.121703835  | 7.92E-12    | 1.80E-11    |
| AC009779.3  | 1.793327944 | 3.783867971 | 1.077222414  | 1.42E-16    | 5.44E-16    |
| IDH1-AS1    | 0.466802571 | 1.204681077 | 1.36776685   | 1.70E-09    | 3.09E-09    |
| AL162595.1  | 0.249470838 | 0.770419963 | 1.626773904  | 1.36E-17    | 5.88E-17    |
| LINC00853   | 0.287481801 | 2.16617787  | 2.913609178  | 1.23E-21    | 1.33E-20    |
| LENG8-AS1   | 0.190327248 | 0.882615372 | 2.213302754  | 1.87E-24    | 4.98E-23    |
| AC008443.5  | 0.643931135 | 1.837000871 | 1.512373998  | 4.13E-10    | 8.03E-10    |

|            |             |             |              |             |             |
|------------|-------------|-------------|--------------|-------------|-------------|
| AC005261.3 | 1.477344925 | 2.973787727 | 1.009294969  | 9.39E-18    | 4.12E-17    |
| AC022306.2 | 0.302516035 | 1.223073082 | 2.01542709   | 1.27E-22    | 1.75E-21    |
| AC142472.1 | 0.21840088  | 0.663329078 | 1.602746102  | 5.37E-19    | 2.97E-18    |
| SNHG21     | 0.193549448 | 0.642201266 | 1.730323318  | 6.92E-21    | 6.00E-20    |
| AC011445.2 | 0.303189394 | 2.805597689 | 3.210016957  | 8.52E-21    | 6.98E-20    |
| AC005840.4 | 0.281507481 | 0.568706594 | 1.01451127   | 1.34E-08    | 2.24E-08    |
| NEAT1      | 5.481794673 | 12.64570131 | 1.205926853  | 9.87E-09    | 1.68E-08    |
| AC016394.3 | 0.189737859 | 0.830290432 | 2.129608503  | 8.24E-21    | 6.90E-20    |
| AC012313.9 | 0.864041361 | 1.757568206 | 1.024408398  | 9.24E-07    | 1.36E-06    |
| AC103706.1 | 0.254451288 | 1.342625954 | 2.399596039  | 7.37E-21    | 6.25E-20    |
| ARHGAP27P1 | 0.177378822 | 0.58458452  | 1.720577858  | 8.63E-21    | 7.00E-20    |
| AC068580.3 | 0.311358987 | 1.017235458 | 1.708002832  | 3.09E-14    | 8.93E-14    |
| AL590666.2 | 0.176694271 | 2.469023349 | 3.804613307  | 2.09E-16    | 7.92E-16    |
| PRR34-AS1  | 0.935418166 | 3.428075084 | 1.873715357  | 2.02E-13    | 5.30E-13    |
| ST7-AS1    | 0.206385609 | 0.545946436 | 1.403417034  | 9.95E-11    | 2.08E-10    |
| TBX2-AS1   | 0.171173754 | 0.777199041 | 2.182822608  | 9.24E-12    | 2.08E-11    |
| AC005332.5 | 0.35977232  | 1.790951899 | 2.315570493  | 1.06E-26    | 9.92E-25    |
| AL359504.1 | 0.175786082 | 0.544794729 | 1.631891892  | 6.39E-14    | 1.75E-13    |
| LINC02035  | 0.291287034 | 0.61888106  | 1.087220688  | 1.71E-10    | 3.45E-10    |
| LINC02027  | 5.577540796 | 1.867270798 | -1.578697993 | 1.67E-19    | 1.03E-18    |
| AP003486.1 | 0.341557722 | 0.827402843 | 1.276460506  | 1.61E-15    | 5.30E-15    |
| AC012467.2 | 0.571004256 | 1.269548577 | 1.152742195  | 5.50E-20    | 3.76E-19    |
| AC006026.3 | 0.270700234 | 0.648451532 | 1.260302612  | 0.001284124 | 0.001532731 |
| AC010973.2 | 0.110304907 | 0.626642246 | 2.50614507   | 7.06E-26    | 4.05E-24    |
| ITGB1-DT   | 0.566652551 | 1.563889238 | 1.464602031  | 0.001060006 | 0.001271325 |
| AL365181.3 | 0.226268093 | 4.241738086 | 4.22855048   | 7.58E-18    | 3.39E-17    |
| AC011700.1 | 0.233290374 | 0.548132885 | 1.232398911  | 3.56E-06    | 4.99E-06    |
| AC008735.2 | 0.370896114 | 1.546772708 | 2.060174156  | 6.96E-16    | 2.49E-15    |
| AC068506.1 | 0.120930405 | 0.753633091 | 2.639685291  | 0.000147972 | 0.000187733 |
| AC011477.2 | 0.542014339 | 1.396629806 | 1.365546743  | 2.86E-09    | 5.10E-09    |
| AL121845.4 | 0.564475392 | 2.073724974 | 1.877241977  | 2.26E-06    | 3.22E-06    |
| U91328.1   | 0.472911956 | 1.228561724 | 1.377326819  | 2.13E-14    | 6.26E-14    |
| AC005332.3 | 1.737847658 | 4.635553191 | 1.415439896  | 2.31E-18    | 1.11E-17    |
| AL050341.2 | 0.901120996 | 2.179594979 | 1.274267334  | 7.24E-16    | 2.56E-15    |
| AC005261.1 | 1.635384881 | 3.932949574 | 1.265981481  | 2.65E-23    | 4.49E-22    |
| AC139100.2 | 0.144008588 | 0.980063702 | 2.766720671  | 6.93E-22    | 8.34E-21    |
| AC012615.1 | 0.456284337 | 1.737742556 | 1.929209329  | 1.10E-23    | 2.28E-22    |
| ASB16-AS1  | 0.835191588 | 2.624522677 | 1.651875977  | 2.86E-25    | 1.19E-23    |
| AL109615.3 | 0.045130976 | 0.733589182 | 4.02278249   | 1.82E-11    | 4.03E-11    |
| LINC01549  | 0.128304699 | 2.128593723 | 4.052254701  | 0.000559799 | 0.000683486 |
| AC087741.2 | 0.352440521 | 1.302650383 | 1.885998225  | 1.72E-13    | 4.56E-13    |
| ZNF687-AS1 | 0.677051958 | 1.868192289 | 1.464304499  | 4.37E-15    | 1.39E-14    |
| AC007566.1 | 0.222305364 | 0.549458697 | 1.305468276  | 4.23E-09    | 7.38E-09    |
| Z98257.1   | 0.170202288 | 0.806714971 | 2.244808595  | 1.08E-08    | 1.82E-08    |



|             |             |             |              |             |             |
|-------------|-------------|-------------|--------------|-------------|-------------|
| AJ009632.2  | 0.319345776 | 1.330368067 | 2.058634171  | 0.020946623 | 0.023604503 |
| CEBPA-DT    | 1.439060475 | 4.884097309 | 1.762964724  | 3.55E-15    | 1.14E-14    |
| AC026369.2  | 0.198161928 | 0.548709301 | 1.469362222  | 1.89E-13    | 4.99E-13    |
| AL162411.1  | 1.669100818 | 3.850118343 | 1.205831691  | 8.23E-09    | 1.41E-08    |
| AC008608.2  | 0.97035516  | 2.1297413   | 1.134093405  | 1.73E-09    | 3.12E-09    |
| ARHGAP5-AS1 | 0.443274539 | 0.929613641 | 1.068430738  | 8.25E-11    | 1.73E-10    |
| AC010719.1  | 0.187139395 | 2.053147927 | 3.455652374  | 5.69E-26    | 3.54E-24    |
| AL441992.2  | 1.048315024 | 3.273099831 | 1.642585287  | 1.85E-20    | 1.37E-19    |
| LINC00205   | 0.28934551  | 1.405556398 | 2.28027618   | 1.03E-21    | 1.14E-20    |
| TRIM52-AS1  | 2.198440573 | 4.953459416 | 1.171955897  | 1.09E-15    | 3.72E-15    |
| AC064807.4  | 0.280908194 | 0.688471886 | 1.293299032  | 6.04E-08    | 9.56E-08    |
| AC078993.1  | 0.026048775 | 0.834589155 | 5.001778747  | 3.55E-10    | 6.96E-10    |
| AP000240.1  | 0.213292759 | 0.639437556 | 1.583968489  | 1.17E-09    | 2.19E-09    |
| SH3BP5-AS1  | 0.32205344  | 0.662067007 | 1.039677136  | 1.34E-09    | 2.48E-09    |
| AC023509.3  | 1.118650355 | 2.483156223 | 1.150415851  | 1.64E-10    | 3.33E-10    |
| AC002456.1  | 0.529780271 | 1.384336111 | 1.385728242  | 8.84E-05    | 0.000114477 |
| AC127024.5  | 0.187298956 | 0.878004363 | 2.228885251  | 9.47E-21    | 7.44E-20    |
| AC015912.3  | 0.368841705 | 1.482855777 | 2.007304591  | 7.30E-11    | 1.55E-10    |
| AC099850.4  | 0.183166256 | 2.081553606 | 3.506435065  | 3.81E-18    | 1.78E-17    |
| AC244090.1  | 3.362676672 | 9.028119138 | 1.42481539   | 1.98E-17    | 8.19E-17    |
| AC084018.1  | 0.231807989 | 1.102951651 | 2.250367358  | 9.36E-17    | 3.66E-16    |
| LINC01093   | 30.82676897 | 4.466403791 | -2.786998094 | 2.29E-25    | 1.01E-23    |
| AC010531.6  | 0.378411652 | 0.970834631 | 1.359269061  | 1.94E-06    | 2.79E-06    |
| ZNNT1       | 0.370407384 | 1.615050871 | 2.124394846  | 1.39E-20    | 1.04E-19    |
| AC110285.2  | 0.228375502 | 1.539481976 | 2.75296517   | 3.56E-19    | 2.09E-18    |
| AL365330.1  | 0.376062086 | 0.925295021 | 1.298942564  | 1.51E-11    | 3.39E-11    |
| ELFN1-AS1   | 0.045659788 | 0.910601674 | 4.317824032  | 0.005868812 | 0.006787804 |
| AC008736.1  | 0.374566423 | 1.090305671 | 1.541439174  | 2.29E-12    | 5.50E-12    |
| AL031985.3  | 0.218938548 | 0.723300283 | 1.72406873   | 8.18E-20    | 5.35E-19    |
| AC109322.1  | 0.245663439 | 1.545493891 | 2.653312885  | 1.87E-27    | 3.49E-25    |
| AL135999.1  | 0.165958864 | 0.647764127 | 1.964642884  | 1.89E-17    | 7.89E-17    |
| AL365203.2  | 0.682079331 | 2.228083578 | 1.707791901  | 3.48E-15    | 1.12E-14    |
| LINC00997   | 0.581848149 | 1.178156961 | 1.017817164  | 8.01E-16    | 2.81E-15    |
| AC010280.2  | 3.545020747 | 0.881214539 | -2.008228867 | 3.36E-21    | 3.30E-20    |
| AC084125.4  | 0.179534961 | 0.671596199 | 1.903329255  | 1.08E-14    | 3.27E-14    |
| AC253536.6  | 0.418572703 | 1.685761684 | 2.009850462  | 3.37E-09    | 5.93E-09    |
| AC007996.1  | 0.225624513 | 0.713521126 | 1.66103233   | 1.58E-15    | 5.22E-15    |
| LINC02241   | 0.000425954 | 0.888620909 | 11.02665541  | 1.28E-12    | 3.15E-12    |
| U62317.2    | 1.545934228 | 3.76831011  | 1.285438755  | 5.74E-16    | 2.08E-15    |
| HAGLR       | 0.011622331 | 1.507578988 | 7.019190308  | 1.39E-27    | 3.46E-25    |
| CTBP1-DT    | 0.738000615 | 1.79760264  | 1.284380225  | 1.00E-21    | 1.13E-20    |
| AC005696.1  | 0.365970408 | 0.830937088 | 1.183012253  | 1.47E-08    | 2.44E-08    |
| MAFG-DT     | 0.119232737 | 1.476454438 | 3.63028453   | 7.98E-25    | 2.48E-23    |
| AC015871.3  | 0.359205171 | 0.80854122  | 1.170513208  | 5.86E-13    | 1.50E-12    |

|            |             |             |             |             |             |
|------------|-------------|-------------|-------------|-------------|-------------|
| AC023090.1 | 0.007746404 | 0.626512415 | 6.337672465 | 7.54E-09    | 1.30E-08    |
| AC007541.1 | 0.399440472 | 1.043334092 | 1.385148783 | 1.04E-15    | 3.57E-15    |
| AC064836.2 | 0.48865458  | 1.086648122 | 1.152997924 | 7.08E-10    | 1.35E-09    |
| AC007406.2 | 0.160209815 | 1.189948631 | 2.892864855 | 1.98E-06    | 2.83E-06    |
| AC095057.3 | 0.171051357 | 0.559145661 | 1.708794616 | 2.95E-12    | 7.01E-12    |
| LUCAT1     | 0.021122813 | 0.57882412  | 4.776251183 | 1.12E-08    | 1.89E-08    |
| ZFAS1      | 6.459190071 | 19.5377496  | 1.596839125 | 1.38E-17    | 5.91E-17    |
| SNHG30     | 1.354942417 | 3.94449477  | 1.541608984 | 8.44E-19    | 4.37E-18    |
| LINC01703  | 0.124766739 | 1.046642993 | 3.068464132 | 2.05E-20    | 1.50E-19    |
| AC004816.1 | 0.145397766 | 0.996639123 | 2.777066105 | 1.32E-22    | 1.75E-21    |
| AC004148.1 | 0.262707804 | 0.790841278 | 1.589929119 | 1.07E-15    | 3.67E-15    |
| WNT5A-AS1  | 0.191036281 | 0.608340758 | 1.671033007 | 0.003879301 | 0.004507724 |
| AC024075.2 | 0.804419872 | 2.408967513 | 1.582394311 | 4.93E-21    | 4.54E-20    |
| AL117379.1 | 0.126153369 | 0.619513827 | 2.295957745 | 1.10E-21    | 1.21E-20    |
| AC084824.5 | 0.428670073 | 1.024414475 | 1.256859938 | 1.66E-13    | 4.42E-13    |
| AC002398.1 | 0.309953994 | 0.89412751  | 1.528426491 | 4.96E-15    | 1.57E-14    |
| AC048341.2 | 0.215024899 | 1.087920841 | 2.338997956 | 3.03E-21    | 3.10E-20    |
| AL133353.1 | 0.382270755 | 1.009005152 | 1.400266804 | 1.99E-09    | 3.57E-09    |
| AC016747.1 | 1.090885513 | 2.809531913 | 1.364830087 | 8.60E-27    | 9.41E-25    |
| AC104958.2 | 3.574542894 | 12.10274127 | 1.759503185 | 3.24E-14    | 9.23E-14    |
| YTHDF3-AS1 | 0.868331048 | 2.105716105 | 1.277993869 | 1.34E-10    | 2.74E-10    |
| AL390728.6 | 0.992260074 | 3.99979806  | 2.011136954 | 1.78E-18    | 8.85E-18    |
| DSCR8      | 0.00244764  | 1.188884955 | 8.924001807 | 8.02E-09    | 1.38E-08    |
| LINC00623  | 0.739845703 | 1.692710584 | 1.194038997 | 2.17E-11    | 4.77E-11    |
| LINC01770  | 0.756309157 | 1.989616771 | 1.395442583 | 2.32E-07    | 3.47E-07    |
| AC090587.1 | 0.486698677 | 1.009292034 | 1.052242913 | 4.96E-08    | 7.92E-08    |
| BACE1-AS   | 0.560946135 | 2.149493231 | 1.93806242  | 5.04E-25    | 1.71E-23    |
| AP003119.1 | 0.195245302 | 0.959530531 | 2.297040877 | 3.04E-09    | 5.39E-09    |
| SNHG25     | 0.651616432 | 5.018618531 | 2.945195399 | 1.99E-23    | 3.54E-22    |
| AC120053.1 | 0.550379964 | 1.628418854 | 1.564971974 | 6.09E-20    | 4.13E-19    |
| LINC00342  | 0.389268718 | 1.131617874 | 1.539548553 | 2.17E-14    | 6.33E-14    |
| AL603839.3 | 0.272784641 | 0.73406321  | 1.428141882 | 4.54E-09    | 7.88E-09    |
| AL359921.2 | 0.474473608 | 1.734023842 | 1.869723987 | 1.10E-20    | 8.56E-20    |
| PRANCR     | 0.41516073  | 1.046368482 | 1.333649099 | 9.09E-18    | 4.01E-17    |
| LINC02062  | 0.207210491 | 0.548325263 | 1.403934893 | 1.58E-11    | 3.53E-11    |
| ANKRD10-IT | 0.853367549 | 2.269042412 | 1.410844419 | 1.66E-07    | 2.51E-07    |
| AC011477.1 | 0.378294556 | 0.986701954 | 1.383104352 | 2.25E-07    | 3.37E-07    |
| AC084036.1 | 1.12804949  | 3.565437322 | 1.660248679 | 4.51E-16    | 1.66E-15    |
| AC083843.3 | 0.297522336 | 0.754352715 | 1.342241268 | 1.38E-08    | 2.29E-08    |
| AFDN-DT    | 0.31698972  | 0.69187532  | 1.126076025 | 1.38E-09    | 2.54E-09    |
| AC131009.3 | 0.451700065 | 1.221894441 | 1.435682632 | 1.75E-12    | 4.23E-12    |
| LMNTD2-AS1 | 0.195996941 | 0.824573498 | 2.072816959 | 7.63E-14    | 2.06E-13    |
| AC090015.1 | 0.001594639 | 0.891997267 | 9.127665984 | 6.85E-11    | 1.47E-10    |
| AL360181.1 | 1.31039534  | 2.764977981 | 1.07726586  | 0.027017364 | 0.030037189 |

|             |             |             |              |             |             |
|-------------|-------------|-------------|--------------|-------------|-------------|
| SNHG20      | 0.361795401 | 1.288704254 | 1.832675243  | 3.89E-24    | 9.59E-23    |
| AC092171.5  | 0.415698096 | 1.573044823 | 1.919951736  | 1.35E-17    | 5.85E-17    |
| LINC01270   | 0.629098944 | 1.424774549 | 1.179374805  | 2.59E-13    | 6.77E-13    |
| AC112206.2  | 2.48397517  | 1.192771271 | -1.058333338 | 3.70E-12    | 8.68E-12    |
| AL121944.2  | 1.261878189 | 2.52790702  | 1.002370748  | 6.35E-11    | 1.37E-10    |
| LINC01836   | 0.229212304 | 0.878819225 | 1.938881939  | 0.004285153 | 0.004971577 |
| AC055822.1  | 0.221619813 | 0.704283912 | 1.66807026   | 4.86E-14    | 1.35E-13    |
| AC009005.1  | 0.189460554 | 1.413915171 | 2.899726156  | 3.69E-20    | 2.62E-19    |
| TMEM161B-A  | 0.402836291 | 1.107876099 | 1.459530978  | 1.25E-18    | 6.28E-18    |
| AC010969.2  | 0.527831155 | 1.193936672 | 1.177577904  | 1.85E-17    | 7.82E-17    |
| LINC01503   | 0.55685278  | 1.431528286 | 1.362188311  | 0.002720992 | 0.003191604 |
| AL132989.1  | 0.29530129  | 0.661630484 | 1.163838049  | 1.61E-07    | 2.43E-07    |
| LINC01124   | 0.949324823 | 3.414408658 | 1.846662027  | 2.77E-05    | 3.70E-05    |
| AC092171.2  | 0.320882438 | 3.082692473 | 3.264074239  | 1.15E-27    | 3.46E-25    |
| PXN-AS1     | 0.720148228 | 1.894677722 | 1.39558668   | 4.65E-21    | 4.45E-20    |
| SNHG6       | 11.70091059 | 45.53758456 | 1.960436961  | 3.16E-21    | 3.14E-20    |
| AC007448.4  | 0.264069376 | 0.772097766 | 1.547866538  | 1.03E-09    | 1.95E-09    |
| ELF3-AS1    | 0.433825204 | 2.177377172 | 2.32740556   | 1.04E-19    | 6.67E-19    |
| LINC01138   | 0.226352932 | 1.055284413 | 2.220985978  | 5.96E-23    | 9.07E-22    |
| AC010735.2  | 0.39527788  | 1.056607408 | 1.418500302  | 1.02E-09    | 1.92E-09    |
| COA6-AS1    | 1.036828394 | 3.322924388 | 1.680276333  | 7.34E-18    | 3.30E-17    |
| AC021078.1  | 0.380295507 | 0.829083598 | 1.124396685  | 9.11E-14    | 2.45E-13    |
| NIFK-AS1    | 0.570199117 | 1.264887373 | 1.149471222  | 3.89E-19    | 2.27E-18    |
| LINC01287   | 0.004107994 | 2.936954242 | 9.48167102   | 3.81E-10    | 7.43E-10    |
| AC026401.3  | 0.913816837 | 3.270510914 | 1.839539099  | 2.24E-18    | 1.08E-17    |
| TYMSOS      | 0.779702209 | 2.927928488 | 1.90888519   | 3.63E-14    | 1.03E-13    |
| PTOV1-AS1   | 0.473181926 | 1.231985274 | 1.380518137  | 4.84E-23    | 7.52E-22    |
| TMEM44-AS1  | 2.565958159 | 5.85702141  | 1.190669522  | 1.52E-12    | 3.74E-12    |
| UBR5-AS1    | 0.675681847 | 1.838510237 | 1.444121209  | 1.57E-23    | 2.94E-22    |
| PRKAR1B-AS  | 0.312737134 | 0.842777698 | 1.430201606  | 1.88E-08    | 3.12E-08    |
| MALAT1      | 2.157594368 | 6.152177036 | 1.511673358  | 1.04E-15    | 3.57E-15    |
| SLC25A25-AS | 0.693351964 | 1.842662328 | 1.410131924  | 8.60E-10    | 1.63E-09    |
| LINC01151   | 0.41965412  | 2.837885536 | 2.757543749  | 1.20E-06    | 1.76E-06    |
| AC068580.1  | 0.204722347 | 0.892078858 | 2.123502654  | 2.97E-13    | 7.71E-13    |
| AC009065.5  | 0.169893115 | 0.610909471 | 1.846331221  | 5.94E-21    | 5.28E-20    |
| NUP50-DT    | 1.823179193 | 4.173294113 | 1.194730233  | 2.48E-12    | 5.94E-12    |
| Z95115.1    | 0.339388079 | 1.009343242 | 1.572409069  | 5.82E-14    | 1.60E-13    |
| AC104794.3  | 1.431963411 | 3.121834393 | 1.124399377  | 4.55E-14    | 1.27E-13    |
| AC008549.1  | 23.38094883 | 11.31305724 | -1.047344621 | 3.88E-14    | 1.09E-13    |
| SLC6A1-AS1  | 0.15158503  | 0.554465243 | 1.870969739  | 4.88E-06    | 6.81E-06    |
| AC007298.2  | 1.130859474 | 0.532698123 | -1.08602956  | 1.08E-12    | 2.68E-12    |
| DNAJC3-DT   | 0.43136521  | 1.022507692 | 1.245129966  | 7.99E-11    | 1.68E-10    |
| AC018904.1  | 0.950886676 | 2.411730255 | 1.342723234  | 4.94E-16    | 1.80E-15    |
| AL049840.6  | 2.05730479  | 5.375174621 | 1.385556079  | 1.63E-19    | 1.02E-18    |

|             |             |             |             |             |             |
|-------------|-------------|-------------|-------------|-------------|-------------|
| AC009237.15 | 0.246232376 | 0.665483481 | 1.434382388 | 5.71E-12    | 1.31E-11    |
| AL021807.1  | 0.076370158 | 0.629068154 | 3.042135407 | 1.32E-16    | 5.07E-16    |
| AC124798.1  | 0.181985717 | 0.617449882 | 1.762496814 | 0.025528244 | 0.028423985 |
| HCG18       | 0.341766982 | 0.924909344 | 1.436298938 | 2.01E-18    | 9.85E-18    |
| NRAV        | 0.820404199 | 2.090722421 | 1.349594751 | 3.98E-19    | 2.30E-18    |
| LINC02506   | 0.13755911  | 2.400834645 | 4.125412452 | 7.54E-05    | 9.84E-05    |
| AC040970.1  | 0.106725055 | 0.629852031 | 2.561114035 | 7.47E-06    | 1.03E-05    |
| PITPNA-AS1  | 1.650809657 | 4.433618872 | 1.425310974 | 6.23E-16    | 2.24E-15    |
| AL162582.1  | 0.133942952 | 1.827624126 | 3.770278813 | 1.23E-09    | 2.30E-09    |
