# Supplementary material for: Identification of Epithelial Mesenchymal Transition-Related lncRNAs Associated with Prognosis and Tumor Immune Microenvironment of Hepatocellular Carcinoma
Source: Hindawi journal article supplement (doi:10.1155/2022/6335155), 2022-01-15
Supplement: f2 [file 6335155.f2.pdf]

| Id          | HR          | HR.95L      | HR.95H      | P-value     |
|-------------|-------------|-------------|-------------|-------------|
| SNHG15      | 1.12923702  | 1.007351741 | 1.2658699   | 0.037009612 |
| AL354733.3  | 1.101176225 | 0.737275989 | 1.644688146 | 0.637734684 |
| MUC12-AS1   | 1.255638248 | 0.994295217 | 1.585673334 | 0.055887222 |
| AC006042.1  | 0.98293021  | 0.760852547 | 1.269827906 | 0.895169596 |
| VPS13B-DT   | 1.04288284  | 0.945220131 | 1.150636326 | 0.40260674  |
| AP006621.2  | 0.98969662  | 0.872652971 | 1.122438622 | 0.871871436 |
| THUMPD3-A   | 1.492884282 | 1.250498816 | 1.782251573 | 9.29E-06    |
| AC025265.1  | 1.205387454 | 1.030712526 | 1.409664555 | 0.01935157  |
| AC022613.1  | 0.973081443 | 0.916571357 | 1.033075589 | 0.371354033 |
| AL451165.2  | 1.044013573 | 0.980777768 | 1.111326517 | 0.176656878 |
| AL359513.1  | 1.332606109 | 0.962989051 | 1.844090584 | 0.083198252 |
| LINC02428   | 0.958052706 | 0.918907946 | 0.998865003 | 0.044081047 |
| AC005586.1  | 0.973649041 | 0.699049676 | 1.356116008 | 0.874481533 |
| MYLK-AS1    | 1.357240901 | 1.049487149 | 1.75524099  | 0.019906296 |
| LINC00942   | 1.033019339 | 1.001830646 | 1.065178988 | 0.037811331 |
| LINC00886   | 0.864446294 | 0.683867802 | 1.092707381 | 0.22307318  |
| AL355353.2  | 1.050609583 | 0.962111246 | 1.147248306 | 0.271484744 |
| ZNF529-AS1  | 1.37387136  | 1.074661654 | 1.756387703 | 0.011259807 |
| ZNF213-AS1  | 1.11269793  | 0.872853667 | 1.418447021 | 0.388624341 |
| LINC00896   | 1.111766519 | 0.827140548 | 1.494334663 | 0.482562067 |
| AC073611.1  | 1.92453978  | 1.460045474 | 2.536806852 | 3.39E-06    |
| AL135905.1  | 0.967463606 | 0.904078569 | 1.035292574 | 0.338694938 |
| TAT-AS1     | 0.846974692 | 0.688036571 | 1.042627905 | 0.117281459 |
| DANCR       | 1.022182281 | 1.004663044 | 1.040007017 | 0.012867984 |
| AL645933.3  | 1.009425256 | 0.875379887 | 1.163996753 | 0.897319172 |
| SNHG12      | 1.17163711  | 1.066845273 | 1.28672222  | 0.000921349 |
| LINC01139   | 1.004238644 | 0.963292061 | 1.04692574  | 0.842150039 |
| AC093673.1  | 1.030074789 | 0.994972181 | 1.066415816 | 0.093928317 |
| AC005586.2  | 1.135303134 | 0.912253839 | 1.412888771 | 0.255509211 |
| LINC01942   | 0.858602073 | 0.701049953 | 1.051562041 | 0.140511892 |
| LNCTAM34A   | 0.897015475 | 0.639737093 | 1.25776162  | 0.528572326 |
| SNHG8       | 1.005553636 | 0.998527866 | 1.012628839 | 0.121587056 |
| AL161669.3  | 0.982859143 | 0.865297226 | 1.116393381 | 0.7902377   |
| TMPO-AS1    | 1.141564984 | 0.974934685 | 1.336674788 | 0.100043975 |
| MAN1B1-DT   | 1.304331127 | 0.822408502 | 2.068655278 | 0.258861937 |
| AL139384.1  | 1.222209542 | 1.068483502 | 1.398052625 | 0.00343563  |
| AZIN1-AS1   | 1.139079188 | 0.819605168 | 1.583081036 | 0.438099994 |
| AC112491.1  | 1.028676691 | 0.980256411 | 1.079488718 | 0.250417169 |
| AC068987.3  | 1.15579648  | 1.077045048 | 1.240306064 | 5.79E-05    |
| AC010547.2  | 1.002460546 | 0.954848078 | 1.052447157 | 0.921150302 |
| AC016405.3  | 1.382242708 | 1.156044314 | 1.652700403 | 0.000384754 |
| AL606489.1  | 1.15380122  | 0.97223336  | 1.369277491 | 0.10150012  |
| ZSCAN16-AS1 | 0.990836124 | 0.950585985 | 1.032790551 | 0.66349265  |

|            |             |             |             |             |
|------------|-------------|-------------|-------------|-------------|
| AC009407.1 | 0.999813915 | 0.979210894 | 1.020850432 | 0.98602367  |
| AC090589.3 | 1.191495567 | 0.871428359 | 1.629120365 | 0.272322367 |
| ZFPM2-AS1  | 1.084341408 | 1.036862145 | 1.133994808 | 0.000393259 |
| AC012510.1 | 1.202356772 | 1.001296964 | 1.443789264 | 0.048399182 |
| RAB30-DT   | 1.141428822 | 0.991897753 | 1.313502075 | 0.064832686 |
| AC011468.1 | 1.079984409 | 0.896901656 | 1.30043948  | 0.416856583 |
| LINC01671  | 1.098684121 | 0.90099182  | 1.339753337 | 0.352443511 |
| AL355102.4 | 1.016359463 | 0.986912558 | 1.046684987 | 0.279362759 |
| ZNF710-AS1 | 0.905470401 | 0.774244786 | 1.058937253 | 0.213835798 |
| ASMTL-AS1  | 1.076179951 | 1.007268153 | 1.149806318 | 0.029671344 |
| AC020765.2 | 1.215704158 | 0.906506167 | 1.630365742 | 0.192085095 |
| AC015982.2 | 1.446721214 | 1.088538503 | 1.922763657 | 0.010943858 |
| AC007099.1 | 1.013911571 | 0.989244363 | 1.039193866 | 0.271584974 |
| AL031673.1 | 1.090916736 | 0.988860499 | 1.203505778 | 0.082487722 |
| SNHG32     | 1.008479587 | 1.001758487 | 1.015245781 | 0.013326109 |
| RUSC1-AS1  | 1.160793492 | 1.043242874 | 1.291589489 | 0.006198614 |
| AC008771.1 | 1.118056637 | 1.001874014 | 1.247712413 | 0.046216697 |
| CRIM1-DT   | 1.039333361 | 1.001212449 | 1.078905717 | 0.043019649 |
| LINC01004  | 1.424151524 | 1.07992344  | 1.878103103 | 0.012257901 |
| DLG5-AS1   | 1.079481433 | 0.949150344 | 1.227708731 | 0.244017867 |
| MUC20-OT1  | 1.215206621 | 0.826570958 | 1.786570309 | 0.321546889 |
| AP000894.4 | 1.131772799 | 0.962541246 | 1.330758214 | 0.134144249 |
| ZEB1-AS1   | 1.329083311 | 1.019692641 | 1.732347942 | 0.035360708 |
| ZNF503-AS2 | 1.401073439 | 1.064571847 | 1.84394016  | 0.016107492 |
| AL445524.1 | 1.001909027 | 0.992612409 | 1.011292715 | 0.688432265 |
| AL354836.1 | 1.0304711   | 0.910968734 | 1.165649983 | 0.633165237 |
| AP002748.4 | 1.159650802 | 0.881749371 | 1.525138579 | 0.289304988 |
| lnc-CCNY-1 | 1.655312487 | 1.351399952 | 2.027571057 | 1.12E-06    |
| ZNF793-AS1 | 1.103499019 | 0.962252079 | 1.265479297 | 0.158736735 |
| FAM99B     | 0.977781278 | 0.927051558 | 1.031287008 | 0.408460071 |
| AC009022.1 | 0.904970952 | 0.553817818 | 1.478775867 | 0.690236224 |
| AL162413.1 | 0.967300359 | 0.930776661 | 1.005257248 | 0.09046369  |
| AL035071.1 | 1.088216425 | 1.005489201 | 1.177750081 | 0.036112032 |
| AC012146.1 | 1.176821563 | 1.025533408 | 1.350427964 | 0.02039054  |
| AC009275.1 | 1.166794296 | 1.00350723  | 1.356650842 | 0.044911707 |
| AP001372.2 | 1.327786204 | 0.950700683 | 1.854438767 | 0.096241435 |
| AL358472.2 | 1.232293485 | 0.856044486 | 1.773911587 | 0.261121249 |
| AC139530.1 | 1.194138133 | 0.999210166 | 1.427093047 | 0.051024442 |
| AC022424.1 | 1.049826241 | 1.015982813 | 1.084797028 | 0.003633023 |
| AL354892.2 | 1.142111222 | 1.04140665  | 1.252553979 | 0.004780728 |
| KCNMB2-AS  | 1.176027766 | 1.02636412  | 1.347515253 | 0.019561292 |
| MID1IP1-AS | 0.983182173 | 0.811029183 | 1.191877192 | 0.862889    |
| NOP14-AS1  | 1.393445856 | 1.027174    | 1.890323696 | 0.032984285 |
| C2-AS1     | 0.89508165  | 0.639177529 | 1.253440749 | 0.518830059 |

|             |             |             |             |             |
|-------------|-------------|-------------|-------------|-------------|
| AC068888.1  | 1.215735093 | 1.013373283 | 1.458506791 | 0.035467839 |
| BX322562.1  | 1.002306665 | 0.929809465 | 1.080456469 | 0.952038957 |
| SNHG19      | 1.005978465 | 0.998809424 | 1.013198962 | 0.102364542 |
| AL121899.1  | 1.014163986 | 0.941342043 | 1.092619413 | 0.711420451 |
| AC007773.1  | 1.325745931 | 1.095290195 | 1.60469096  | 0.003801466 |
| LINC02298   | 1.092811938 | 0.939157157 | 1.27160606  | 0.25096205  |
| PARD3-AS1   | 1.178804311 | 0.892423255 | 1.557085829 | 0.246679202 |
| AC145207.5  | 1.976943903 | 1.500703237 | 2.604317162 | 1.26E-06    |
| AC087741.1  | 1.535894762 | 1.105172598 | 2.134483541 | 0.010603391 |
| AC024075.1  | 0.937526497 | 0.598721037 | 1.46805587  | 0.777986094 |
| AC022144.1  | 1.03602166  | 0.955051345 | 1.123856728 | 0.394043228 |
| AL360181.2  | 1.093033138 | 0.805602397 | 1.483016243 | 0.567717046 |
| AC027644.3  | 1.036934133 | 0.957105343 | 1.123421161 | 0.374897434 |
| LINC00513   | 1.145630395 | 0.904599049 | 1.450884792 | 0.25929756  |
| BAIAP2-DT   | 0.992885914 | 0.937501333 | 1.051542439 | 0.807390387 |
| SNHG10      | 1.40913328  | 1.205683096 | 1.646914192 | 1.62E-05    |
| AC004687.1  | 0.898144419 | 0.695119698 | 1.160466896 | 0.411270003 |
| STPG3-AS1   | 0.773489981 | 0.577819062 | 1.035422316 | 0.084340676 |
| SNHG29      | 1.005591762 | 1.000848472 | 1.010357532 | 0.020803149 |
| AC023043.4  | 1.1343168   | 0.964111208 | 1.334570734 | 0.128673409 |
| MAP3K2-DT   | 1.200197971 | 1.027357354 | 1.40211696  | 0.021439252 |
| AC027307.2  | 1.015724372 | 0.972571871 | 1.060791528 | 0.4811972   |
| KMT2E-AS1   | 1.020052427 | 0.96743094  | 1.075536156 | 0.462526861 |
| BX537318.1  | 1.188811634 | 0.960992123 | 1.47063963  | 0.111071671 |
| AC020915.3  | 1.508763763 | 1.180002109 | 1.929122054 | 0.001038448 |
| AL356234.2  | 0.827450742 | 0.663496761 | 1.031918725 | 0.092744883 |
| AL392172.1  | 1.031701971 | 0.977290687 | 1.089142638 | 0.258899131 |
| CCDC18-AS1  | 1.127736189 | 0.89787542  | 1.416442508 | 0.301288681 |
| AC138696.2  | 1.068909968 | 0.999431014 | 1.143218997 | 0.051971923 |
| MINCR       | 1.040472983 | 0.964153989 | 1.122833115 | 0.307360639 |
| RPARP-AS1   | 1.179408871 | 0.934400872 | 1.488660089 | 0.164867484 |
| AC103691.1  | 1.111327132 | 0.891926421 | 1.384697173 | 0.346861125 |
| LINC00685   | 1.14643291  | 0.959229445 | 1.37017105  | 0.133006608 |
| AL139287.1  | 1.080158013 | 0.989295571 | 1.17936577  | 0.085448757 |
| ALDH1L1-AS1 | 0.694872003 | 0.471059357 | 1.025023902 | 0.066453639 |
| AC040977.1  | 1.019599247 | 0.92675891  | 1.121740091 | 0.690286045 |
| CYTOR       | 1.064436661 | 1.028479296 | 1.101651156 | 0.00036864  |
| AC115618.2  | 1.03547667  | 0.957413716 | 1.119904506 | 0.383352446 |
| MELTF-AS1   | 1.169853739 | 1.039866796 | 1.316089499 | 0.009041888 |
| SNHG1       | 1.051663596 | 1.023521969 | 1.080578973 | 0.000272655 |
| AC104113.1  | 1.45264074  | 1.133839894 | 1.861078562 | 0.003141121 |
| GPRC5D-AS   | 1.510260104 | 1.095650636 | 2.081763572 | 0.01180786  |
| LINC01857   | 0.892013997 | 0.683602063 | 1.163965141 | 0.399975768 |
| AC010331.1  | 1.313163827 | 0.943327502 | 1.827996356 | 0.106468024 |

|            |             |             |             |             |
|------------|-------------|-------------|-------------|-------------|
| AC005332.4 | 1.222289163 | 0.942382313 | 1.58533408  | 0.130348798 |
| AC000123.1 | 1.289577234 | 0.925744335 | 1.796402506 | 0.132648316 |
| AL035461.3 | 1.099837563 | 1.021391926 | 1.184308035 | 0.011715347 |
| AL022328.2 | 1.017636777 | 0.87798175  | 1.179505849 | 0.816432516 |
| CAMTA1-DT  | 1.225477525 | 0.87795054  | 1.710569212 | 0.232094792 |
| AL118516.1 | 1.085909336 | 1.000492445 | 1.17861868  | 0.04863904  |
| AC132872.1 | 1.061881504 | 0.965117205 | 1.168347558 | 0.218083595 |
| SREBF2-AS1 | 1.519553164 | 1.189027639 | 1.941958069 | 0.000827461 |
| AC147067.1 | 1.061134547 | 0.874031683 | 1.288290286 | 0.548797441 |
| AC091271.1 | 1.048122906 | 0.8992315   | 1.221667197 | 0.547677439 |
| AC020978.4 | 0.972606355 | 0.912971343 | 1.036136708 | 0.389586855 |
| AC124016.3 | 0.953660746 | 0.662084418 | 1.373644801 | 0.798846583 |
| FAM111A-D  | 1.529203101 | 1.029483993 | 2.271489541 | 0.035387581 |
| AL022328.1 | 1.114940149 | 0.813683491 | 1.52773351  | 0.498404009 |
| TMEM147-A  | 1.305925605 | 1.022840322 | 1.667358678 | 0.032264028 |
| AC012313.1 | 1.237933379 | 0.875625847 | 1.750152825 | 0.226981156 |
| AP000424.2 | 1.097870439 | 0.966849764 | 1.246646115 | 0.149856837 |
| NCK1-DT    | 1.428112757 | 1.083590069 | 1.882174914 | 0.011409427 |
| AL158071.3 | 1.124361736 | 0.827857063 | 1.527062303 | 0.45297835  |
| AL928654.2 | 1.273607603 | 0.999442193 | 1.622981636 | 0.05052966  |
| AC019117.2 | 1.022731069 | 0.952645279 | 1.097973046 | 0.534887424 |
| AC068473.5 | 1.458537561 | 1.191628331 | 1.785230983 | 0.000252108 |
| SNHG7      | 1.048991519 | 1.024162995 | 1.074421954 | 9.09E-05    |
| CR936218.2 | 0.785954855 | 0.610551852 | 1.011748686 | 0.061579354 |
| LINC00957  | 1.097108609 | 0.869435059 | 1.384401614 | 0.434819561 |
| CD2BP2-DT  | 1.036664727 | 0.91767279  | 1.171085999 | 0.562688231 |
| LINC01963  | 1.257479113 | 0.941398947 | 1.679685031 | 0.120872605 |
| AC015813.1 | 1.100496062 | 0.930649673 | 1.301339933 | 0.262869419 |
| AL023803.1 | 1.006801367 | 0.891984094 | 1.136398058 | 0.912632585 |
| AC006504.7 | 1.616184932 | 1.329444369 | 1.964770994 | 1.45E-06    |
| APTR       | 1.116529025 | 0.963735563 | 1.29354681  | 0.142102096 |
| LINC00106  | 1.089469322 | 0.981789999 | 1.20895854  | 0.106560648 |
| SNHG9      | 1.00115946  | 0.980112537 | 1.022658344 | 0.914871507 |
| TAF1A-AS1  | 0.873701318 | 0.684112605 | 1.115830914 | 0.279337341 |
| AC008267.5 | 1.007848997 | 0.957293766 | 1.061074079 | 0.765886741 |
| AC009065.9 | 1.090363273 | 0.855038509 | 1.390454413 | 0.485535482 |
| AC008610.1 | 1.166317253 | 1.014420807 | 1.340958234 | 0.03068915  |
| AL161668.4 | 0.951347883 | 0.889951868 | 1.016979488 | 0.14283736  |
| AC026462.3 | 1.019830383 | 0.990042699 | 1.050514297 | 0.19418089  |
| EIF3J-DT   | 1.119118327 | 0.852067791 | 1.469866415 | 0.418475743 |
| PURPL      | 0.941670511 | 0.734975446 | 1.206493845 | 0.634557444 |
| LINC01980  | 1.0538563   | 0.991903409 | 1.11967868  | 0.089702197 |
| MIR210HG   | 1.182600789 | 1.079430471 | 1.295631968 | 0.000316874 |
| OTUD6B-AS  | 1.063746472 | 0.916021417 | 1.23529487  | 0.417883134 |

|             |             |             |             |             |
|-------------|-------------|-------------|-------------|-------------|
| AC016394.2  | 1.787831153 | 1.382035454 | 2.312777305 | 9.72E-06    |
| AL031058.1  | 1.027734115 | 0.999201971 | 1.057080992 | 0.056859669 |
| AC009237.14 | 1.118216276 | 0.991813868 | 1.260728128 | 0.067901707 |
| AC010761.1  | 1.659406309 | 1.298648567 | 2.120380655 | 5.14E-05    |
| AP001505.1  | 1.017539055 | 0.969920344 | 1.06749563  | 0.477072899 |
| AC132872.3  | 1.451287347 | 1.057079844 | 1.992503194 | 0.021265358 |
| AC022150.2  | 1.384449621 | 1.055184949 | 1.816459527 | 0.018893907 |
| AC083880.1  | 1.327696444 | 0.948673411 | 1.858150366 | 0.098385459 |
| AC016888.1  | 1.01254992  | 0.969714799 | 1.057277192 | 0.571725365 |
| LINC01003   | 1.058983995 | 0.905022075 | 1.239137843 | 0.474629775 |
| AL359643.3  | 1.369631642 | 1.040920771 | 1.802145645 | 0.024679031 |
| AC079305.2  | 1.030049918 | 1.009086195 | 1.051449162 | 0.004770402 |
| MAPKAPK5-   | 1.137601716 | 1.055040168 | 1.226624071 | 0.000797245 |
| AC004540.2  | 1.012966968 | 0.911506094 | 1.125721578 | 0.810905624 |
| AP000593.3  | 0.990064948 | 0.949487601 | 1.032376409 | 0.640043985 |
| AP000254.2  | 1.03134088  | 0.911430386 | 1.167027157 | 0.624591197 |
| LINC02806   | 1.053993103 | 0.980741709 | 1.132715627 | 0.152475523 |
| AC060780.1  | 1.000961538 | 0.943707739 | 1.061688868 | 0.974487212 |
| SNHG14      | 1.450802779 | 1.218181778 | 1.727844515 | 3.00E-05    |
| AL589765.4  | 1.035107076 | 0.912191393 | 1.174585364 | 0.592656475 |
| AC087482.1  | 0.996453772 | 0.97669467  | 1.016612611 | 0.728107981 |
| AC027796.4  | 1.157340679 | 1.030868751 | 1.299328791 | 0.013328414 |
| LINC00221   | 1.143774482 | 1.050215277 | 1.245668477 | 0.002033934 |
| AL391427.1  | 1.049822838 | 1.016310765 | 1.084439947 | 0.003309646 |
| LINC00665   | 1.123461846 | 1.032671408 | 1.2222344   | 0.006774545 |
| PTOV1-AS2   | 1.168913361 | 1.02870931  | 1.328225992 | 0.016658639 |
| SNHG11      | 1.033147424 | 0.991485712 | 1.07655974  | 0.120471024 |
| PPP1R14B-A  | 1.095823543 | 0.95260843  | 1.260569611 | 0.200356402 |
| AL121832.2  | 1.055682528 | 0.958187571 | 1.163097534 | 0.273060708 |
| AC005920.4  | 0.982624133 | 0.875475926 | 1.102886049 | 0.766042733 |
| AC010542.6  | 1.154215124 | 0.874073175 | 1.524143047 | 0.311966048 |
| HEIH        | 1.036042674 | 1.001809246 | 1.071445913 | 0.03888481  |
| AC107375.1  | 1.278896271 | 0.991152876 | 1.650174974 | 0.05854028  |
| AL391056.1  | 0.998134856 | 0.871795631 | 1.142782959 | 0.978430103 |
| FOXD2-AS1   | 1.146201153 | 1.036327861 | 1.267723403 | 0.007954198 |
| LINC01089   | 1.162615559 | 0.932204525 | 1.449976804 | 0.181219791 |
| AL355802.3  | 1.62040795  | 1.111920465 | 2.361429623 | 0.012001375 |
| LINC01436   | 1.02600633  | 0.979473701 | 1.074749622 | 0.27829427  |
| MAGI2-AS3   | 0.866401391 | 0.675055773 | 1.111984224 | 0.260036891 |
| AC092171.3  | 1.159670222 | 0.930464983 | 1.445336523 | 0.187338905 |
| AL591895.1  | 1.003907796 | 0.986308722 | 1.021820897 | 0.665583584 |
| AC074117.1  | 1.661844107 | 1.292561807 | 2.136629614 | 7.45E-05    |
| LINC02163   | 1.104872172 | 0.956520333 | 1.276232689 | 0.175199526 |
| PVT1        | 1.138666729 | 0.993486761 | 1.305062102 | 0.062032624 |

|             |             |             |             |             |
|-------------|-------------|-------------|-------------|-------------|
| AC125257.1  | 1.091802561 | 0.93240314  | 1.278452185 | 0.275378676 |
| AC008764.2  | 1.099380496 | 0.881161344 | 1.371641509 | 0.401311835 |
| RNASEH1-A   | 1.160177129 | 1.037975766 | 1.296765314 | 0.008888311 |
| NRSN2-AS1   | 1.281092958 | 1.046996826 | 1.567530223 | 0.016126398 |
| AC009283.1  | 0.967820019 | 0.890967721 | 1.051301373 | 0.438433701 |
| CHKB-DT     | 1.136743787 | 0.901385654 | 1.433555583 | 0.27888636  |
| PANK2-AS1   | 1.411598181 | 0.977565296 | 2.038338955 | 0.065926496 |
| LINC01484   | 0.998499208 | 0.662573696 | 1.504739283 | 0.994273114 |
| GIHCG       | 1.119218642 | 1.001984687 | 1.250169174 | 0.046033623 |
| SNHG17      | 1.058799826 | 1.000810257 | 1.120149462 | 0.046795449 |
| ST8SIA6-AS1 | 1.045058063 | 0.971994948 | 1.1236132   | 0.23332789  |
| AC104825.1  | 1.175357068 | 0.946576933 | 1.459431546 | 0.143502361 |
| LINC00294   | 1.187149443 | 0.997537117 | 1.41280337  | 0.053335961 |
| AC006449.7  | 1.039909336 | 0.820433295 | 1.318097929 | 0.746276254 |
| AC006213.4  | 1.238454763 | 1.033697361 | 1.483771032 | 0.020373634 |
| AC084824.6  | 0.989847079 | 0.738275185 | 1.327143671 | 0.945619585 |
| AC015849.3  | 1.04901675  | 0.688045144 | 1.599366192 | 0.824016131 |
| AC111000.4  | 1.028595097 | 0.995795367 | 1.062475191 | 0.08816903  |
| RAD51-AS1   | 1.159721046 | 0.916057999 | 1.468196233 | 0.218181992 |
| AC024060.2  | 1.180038134 | 1.058411507 | 1.315641401 | 0.002855902 |
| POLR2J4     | 1.087296164 | 0.784567968 | 1.506833056 | 0.615179128 |
| MHENCRCR    | 1.07260996  | 0.99493274  | 1.15635166  | 0.067622448 |
| LINC01474   | 1.009454591 | 0.999171632 | 1.019843378 | 0.071651015 |
| AL031186.1  | 1.392287297 | 1.022916462 | 1.895036388 | 0.035377417 |
| AC005229.4  | 1.184690384 | 0.95652435  | 1.46728236  | 0.120486239 |
| AP000759.1  | 1.04515771  | 0.880106264 | 1.241162213 | 0.614508535 |
| AC074212.1  | 0.970587798 | 0.738805097 | 1.275086863 | 0.83021006  |
| BX284668.5  | 1.003571011 | 0.971991643 | 1.036176372 | 0.827026257 |
| AL391244.2  | 1.258539808 | 0.9253073   | 1.711779912 | 0.142840218 |
| AL355488.1  | 1.162759427 | 1.013462321 | 1.334050074 | 0.03150102  |
| AC008915.3  | 1.135198146 | 0.971646566 | 1.326279407 | 0.11013439  |
| AP003119.2  | 1.055199775 | 0.952071503 | 1.16949889  | 0.305855737 |
| AL160006.1  | 1.170669315 | 0.92432002  | 1.482675497 | 0.19116335  |
| GLIS2-AS1   | 0.925528719 | 0.815977537 | 1.049787979 | 0.228577538 |
| AL844908.2  | 0.893803009 | 0.616232323 | 1.296400383 | 0.554025302 |
| SBF2-AS1    | 1.543007713 | 1.157818058 | 2.056344505 | 0.003076353 |
| MIR4458HG   | 1.040147115 | 0.899196848 | 1.203191518 | 0.596244217 |
| AL118558.3  | 1.28281892  | 1.032217578 | 1.594261149 | 0.024710088 |
| ASH1L-AS1   | 1.298486213 | 1.029861468 | 1.63717791  | 0.027189566 |
| AC012645.1  | 0.994992058 | 0.665536966 | 1.487534497 | 0.980478376 |
| AL021707.6  | 1.072863466 | 0.93319356  | 1.23343759  | 0.322989483 |
| AC092535.5  | 1.020149561 | 0.997406555 | 1.043411156 | 0.082879249 |
| AC009686.2  | 1.33864172  | 1.034413766 | 1.732345135 | 0.026610923 |
| LINC01176   | 1.13563345  | 0.937105279 | 1.376220326 | 0.194505643 |

|             |             |             |             |             |
|-------------|-------------|-------------|-------------|-------------|
| AP003352.1  | 1.123507838 | 0.96545959  | 1.307428995 | 0.132186965 |
| C2CD4D-AS1  | 1.004485395 | 0.943735944 | 1.069145364 | 0.888181754 |
| AC242426.2  | 1.292794674 | 0.908984506 | 1.838665078 | 0.1530129   |
| AC099508.2  | 0.724700258 | 0.521582448 | 1.006917442 | 0.054999182 |
| AC026740.1  | 1.025890762 | 0.974869103 | 1.079582737 | 0.326060547 |
| AC022784.1  | 0.990970053 | 0.923416999 | 1.063464987 | 0.801186603 |
| LINC01006   | 1.060582579 | 0.911337731 | 1.234268448 | 0.447174963 |
| SNHG3       | 1.083953878 | 1.046316261 | 1.122945378 | 7.79E-06    |
| AC004918.5  | 1.126058268 | 0.874396437 | 1.450151407 | 0.357605344 |
| AL355574.1  | 1.575773039 | 1.28509638  | 1.932198012 | 1.24E-05    |
| SCAMP1-AS1  | 1.138916866 | 0.945753419 | 1.371532582 | 0.170130628 |
| AL512598.1  | 1.145056125 | 1.001466553 | 1.309233468 | 0.047546339 |
| DLGAP1-AS1  | 1.060798567 | 0.984104328 | 1.143469821 | 0.1231998   |
| MIR4435-2HG | 1.168065716 | 1.059093758 | 1.288249985 | 0.001877405 |
| AP002360.2  | 1.047646038 | 0.991149858 | 1.107362538 | 0.099832412 |
| AC013275.1  | 1.006689703 | 0.910888511 | 1.112566628 | 0.896031392 |
| LINC00847   | 1.072562486 | 1.001781326 | 1.148344711 | 0.044319339 |
| VPS9D1-AS1  | 1.124356506 | 0.995686153 | 1.269654648 | 0.058725248 |
| LINC02041   | 1.024908371 | 0.965580581 | 1.087881416 | 0.4186926   |
| PRRT3-AS1   | 1.207554936 | 1.107022142 | 1.317217486 | 2.11E-05    |
| AC010883.1  | 1.022594036 | 0.863694861 | 1.210726855 | 0.795401548 |
| PSORS1C3    | 1.034743165 | 0.85498963  | 1.252288192 | 0.725739329 |
| AC106820.3  | 1.145127741 | 0.98197254  | 1.335391256 | 0.083989142 |
| AC136475.2  | 1.007044509 | 0.839129287 | 1.208560658 | 0.939875338 |
| AC026471.4  | 0.930176819 | 0.755722324 | 1.144903209 | 0.494595375 |
| AC016773.2  | 1.599621202 | 1.156517464 | 2.212494035 | 0.004530486 |
| LINC02604   | 1.080973207 | 0.904059503 | 1.292506822 | 0.393173911 |
| AC007038.1  | 1.564542648 | 1.163181323 | 2.104395635 | 0.003082449 |
| AC010326.3  | 1.102417891 | 1.014636465 | 1.197793741 | 0.021268363 |
| AC243964.3  | 0.973607631 | 0.888558285 | 1.066797569 | 0.566303274 |
| ARRDC1-AS1  | 1.162787058 | 1.048456348 | 1.289585155 | 0.004289766 |
| MMP25-AS1   | 0.920576738 | 0.63055494  | 1.343993167 | 0.668186679 |
| GAS5        | 1.008344628 | 1.003013168 | 1.013704427 | 0.002124269 |
| LINC01186   | 1.087451574 | 0.853328575 | 1.385809594 | 0.497933942 |
| AC132192.2  | 1.255802008 | 1.053094566 | 1.497528081 | 0.011214727 |
| AC007405.4  | 1.134509474 | 1.011257832 | 1.272782969 | 0.031495774 |
| HCP5        | 0.981791358 | 0.952589748 | 1.011888142 | 0.232932041 |
| AP002761.4  | 1.135140967 | 0.909946517 | 1.416066759 | 0.261218573 |
| AC009779.3  | 1.149872136 | 1.040853729 | 1.270309067 | 0.005999015 |
| IDH1-AS1    | 1.152402352 | 0.958462974 | 1.385584229 | 0.131367657 |
| AL162595.1  | 0.887500062 | 0.578776751 | 1.36089841  | 0.584254647 |
| LINC00853   | 1.026465379 | 0.932766601 | 1.129576438 | 0.5927534   |
| LENG8-AS1   | 1.291218109 | 1.032783343 | 1.614321353 | 0.024892955 |
| AC008443.5  | 1.094663343 | 0.982778076 | 1.219286291 | 0.100140817 |

|            |             |             |             |             |
|------------|-------------|-------------|-------------|-------------|
| AC005261.3 | 1.104874276 | 0.966562885 | 1.262977489 | 0.143860738 |
| AC022306.2 | 0.990274479 | 0.755549833 | 1.297920403 | 0.94355402  |
| AC142472.1 | 1.192702271 | 0.856365278 | 1.661135434 | 0.29713981  |
| SNHG21     | 1.788248149 | 1.251942902 | 2.554294958 | 0.001397522 |
| AC011445.2 | 1.012703939 | 0.986535464 | 1.03956655  | 0.344612056 |
| AC005840.4 | 0.987298465 | 0.660072636 | 1.476743931 | 0.950382039 |
| NEAT1      | 1.00094027  | 0.981000932 | 1.021284886 | 0.927059969 |
| AC016394.3 | 1.389967687 | 1.177461593 | 1.640826488 | 0.000100367 |
| AC012313.9 | 0.943387547 | 0.804154837 | 1.106727241 | 0.474423408 |
| AC103706.1 | 1.003020125 | 0.869308629 | 1.157298269 | 0.967048285 |
| ARHGAP27P  | 1.221315203 | 0.892369776 | 1.671516524 | 0.211767255 |
| AC068580.3 | 1.256025443 | 1.062937272 | 1.484189101 | 0.007435961 |
| AL590666.2 | 1.002093659 | 0.917562432 | 1.094412399 | 0.962899594 |
| PRR34-AS1  | 1.031055461 | 0.983021199 | 1.081436865 | 0.208957644 |
| ST7-AS1    | 1.110144521 | 0.667834376 | 1.845398951 | 0.686962248 |
| TBX2-AS1   | 1.071259893 | 0.88695829  | 1.293857639 | 0.474844268 |
| AC005332.5 | 1.26550482  | 1.103070225 | 1.451859014 | 0.000780673 |
| AL359504.1 | 1.428505545 | 1.050851628 | 1.941880315 | 0.022810142 |
| LINC02035  | 1.205350358 | 0.898765115 | 1.616517443 | 0.212317877 |
| LINC02027  | 1.092280358 | 1.014032693 | 1.176565991 | 0.019944006 |
| AP003486.1 | 0.845463704 | 0.55953265  | 1.27751057  | 0.425407561 |
| AC012467.2 | 1.904504388 | 1.384496392 | 2.619824062 | 7.51E-05    |
| AC006026.3 | 1.245057405 | 0.918639524 | 1.687460535 | 0.15767972  |
| AC010973.2 | 1.760627647 | 1.259557559 | 2.461030615 | 0.000931548 |
| ITGB1-DT   | 1.00904503  | 0.98522478  | 1.033441193 | 0.460068319 |
| AL365181.3 | 0.998676403 | 0.954566965 | 1.044824087 | 0.954173825 |
| AC011700.1 | 1.308912935 | 0.965467692 | 1.774531748 | 0.082981369 |
| AC008735.2 | 1.177152203 | 1.067375098 | 1.298219634 | 0.001093178 |
| AC068506.1 | 1.247855856 | 1.11435959  | 1.397344493 | 0.000125248 |
| AC011477.2 | 0.986721347 | 0.902441919 | 1.078871667 | 0.769179739 |
| AL121845.4 | 0.987615763 | 0.912677563 | 1.068706994 | 0.75692929  |
| U91328.1   | 0.995444017 | 0.750655275 | 1.320058384 | 0.974703146 |
| AC005332.3 | 1.059492072 | 0.998674886 | 1.124012896 | 0.055364965 |
| AL050341.2 | 1.115094696 | 1.004772674 | 1.237529855 | 0.040409184 |
| AC005261.1 | 1.062599382 | 0.975721556 | 1.157212771 | 0.162954947 |
| AC139100.2 | 1.285177206 | 1.037266027 | 1.592340255 | 0.021756922 |
| AC012615.1 | 1.229250379 | 1.005169479 | 1.503285293 | 0.04441214  |
| ASB16-AS1  | 1.083369543 | 0.944381453 | 1.24281302  | 0.253005295 |
| AL109615.3 | 0.947435739 | 0.811469278 | 1.106184181 | 0.49450387  |
| LINC01549  | 0.980164401 | 0.930967662 | 1.031960929 | 0.445735177 |
| AC087741.2 | 1.212177124 | 1.064550894 | 1.38027537  | 0.003683882 |
| ZNF687-AS1 | 1.045416902 | 0.967832648 | 1.129220534 | 0.258930625 |
| AC007566.1 | 1.071160931 | 0.76291293  | 1.503953721 | 0.691345327 |
| Z98257.1   | 1.03260548  | 0.952672173 | 1.119245535 | 0.435087566 |



|            |             |             |             |             |
|------------|-------------|-------------|-------------|-------------|
| AJ009632.2 | 0.992085069 | 0.931553504 | 1.056549924 | 0.804603915 |
| CEBPA-DT   | 1.068916146 | 1.02385867  | 1.115956489 | 0.002421188 |
| AC026369.2 | 1.374040827 | 1.120874037 | 1.684389263 | 0.002226838 |
| AL162411.1 | 1.099497743 | 1.034473577 | 1.16860915  | 0.002291046 |
| AC008608.2 | 1.1117      | 0.978208295 | 1.263408721 | 0.104719394 |
| ARHGAP5-A  | 1.429376381 | 1.042976541 | 1.958928853 | 0.026307    |
| AC010719.1 | 1.109090179 | 1.002292457 | 1.227267567 | 0.045039033 |
| AL441992.2 | 1.067218196 | 0.993050725 | 1.146924976 | 0.07669237  |
| LINC00205  | 1.281504141 | 1.130896911 | 1.452168494 | 0.000100916 |
| TRIM52-AS1 | 1.089520529 | 1.01870157  | 1.16526274  | 0.012408559 |
| AC064807.4 | 0.790992913 | 0.52638508  | 1.188616114 | 0.2591533   |
| AC078993.1 | 0.95467853  | 0.857089644 | 1.063378962 | 0.399218964 |
| AP000240.1 | 1.309096318 | 1.069030201 | 1.603072737 | 0.009166726 |
| SH3BP5-AS1 | 1.124449268 | 0.906392192 | 1.394965852 | 0.286242966 |
| AC023509.3 | 0.997429457 | 0.880465028 | 1.129931899 | 0.967738963 |
| AC002456.1 | 1.049178239 | 0.919224785 | 1.197503587 | 0.476729944 |
| AC127024.5 | 1.238913439 | 1.01216736  | 1.516455252 | 0.037780598 |
| AC015912.3 | 1.128322653 | 1.036197885 | 1.228637915 | 0.005466054 |
| AC099850.4 | 1.131391178 | 1.068691185 | 1.197769772 | 2.20E-05    |
| AC244090.1 | 1.009562116 | 0.983255679 | 1.036572366 | 0.479905463 |
| AC084018.1 | 1.240854143 | 1.017363737 | 1.51344003  | 0.033182605 |
| LINC01093  | 0.994212788 | 0.976609026 | 1.012133866 | 0.524279545 |
| AC010531.6 | 1.222690564 | 1.018500622 | 1.467816693 | 0.031037084 |
| ZNNT1      | 1.106864059 | 0.96745343  | 1.266363844 | 0.139347817 |
| AC110285.2 | 1.00994267  | 0.96470917  | 1.057297088 | 0.672163786 |
| AL365330.1 | 1.410689948 | 1.066779748 | 1.865470481 | 0.015805188 |
| ELFN1-AS1  | 1.056397587 | 1.019579236 | 1.094545498 | 0.002435361 |
| AC008736.1 | 0.978719154 | 0.891934335 | 1.073948098 | 0.649790132 |
| AL031985.3 | 2.316110412 | 1.740326504 | 3.082391396 | 8.44E-09    |
| AC109322.1 | 1.214451647 | 1.015542673 | 1.452319871 | 0.033257327 |
| AL135999.1 | 1.125935988 | 0.807990687 | 1.568993145 | 0.483537987 |
| AL365203.2 | 1.1359493   | 1.063183696 | 1.213695072 | 0.000160726 |
| LINC00997  | 1.224510503 | 0.888611631 | 1.687380538 | 0.215686198 |
| AC010280.2 | 0.837355864 | 0.696620241 | 1.006523787 | 0.058664171 |
| AC084125.4 | 0.885271995 | 0.566928117 | 1.382373676 | 0.592009998 |
| AC253536.6 | 0.951939981 | 0.854396916 | 1.060619146 | 0.37187746  |
| AC007996.1 | 1.184889395 | 0.917978899 | 1.529406482 | 0.192652773 |
| LINC02241  | 0.922921298 | 0.787225659 | 1.082007062 | 0.322873667 |
| U62317.2   | 1.031182455 | 0.984326567 | 1.080268776 | 0.195612291 |
| HAGLR      | 1.021865457 | 0.96441753  | 1.082735414 | 0.463750932 |
| CTBP1-DT   | 1.12537997  | 0.894740308 | 1.415472249 | 0.312753438 |
| AC005696.1 | 1.109337852 | 0.927886968 | 1.326271963 | 0.254850117 |
| MAFG-DT    | 1.173750868 | 1.079572569 | 1.276144965 | 0.000173926 |
| AC015871.3 | 0.933584835 | 0.62459277  | 1.395438252 | 0.737534509 |

|            |             |             |             |             |
|------------|-------------|-------------|-------------|-------------|
| AC023090.1 | 1.092007512 | 0.991416165 | 1.202805085 | 0.074241761 |
| AC007541.1 | 1.189621926 | 0.932726763 | 1.517272136 | 0.161846563 |
| AC064836.2 | 1.311341818 | 1.068432094 | 1.609477452 | 0.009507325 |
| AC007406.2 | 1.03122932  | 0.954386301 | 1.114259404 | 0.4363788   |
| AC095057.3 | 1.530872799 | 1.172529342 | 1.998731667 | 0.001749511 |
| LUCAT1     | 1.281756393 | 1.113603074 | 1.475300752 | 0.000540993 |
| ZFAS1      | 1.009737212 | 1.001908075 | 1.017627528 | 0.014689017 |
| SNHG30     | 1.129756162 | 1.050784015 | 1.214663498 | 0.000967617 |
| LINC01703  | 1.032543842 | 0.86258917  | 1.235984432 | 0.727073061 |
| AC004816.1 | 1.215312057 | 1.067590531 | 1.383473675 | 0.003186902 |
| AC004148.1 | 1.213461421 | 0.90820364  | 1.621319885 | 0.190642739 |
| WNT5A-AS1  | 1.159057805 | 0.98393766  | 1.365345642 | 0.077360875 |
| AC024075.2 | 1.131672564 | 0.979102838 | 1.308016628 | 0.094103102 |
| AL117379.1 | 1.280030237 | 0.933484524 | 1.755227179 | 0.125359626 |
| AC084824.5 | 1.425573275 | 1.091697194 | 1.86155939  | 0.009204235 |
| AC002398.1 | 1.152870441 | 0.972734222 | 1.366365265 | 0.100785516 |
| AC048341.2 | 1.159327023 | 1.008252308 | 1.333038503 | 0.037955757 |
| AL133353.1 | 1.023794046 | 0.804042835 | 1.303604986 | 0.848719385 |
| AC016747.1 | 1.159480133 | 1.017405478 | 1.321394672 | 0.026507304 |
| AC104958.2 | 1.016281664 | 1.007152879 | 1.025493192 | 0.000451232 |
| YTHDF3-AS  | 0.982248515 | 0.86066456  | 1.121008335 | 0.790497579 |
| AL390728.6 | 1.038190708 | 1.003502358 | 1.07407814  | 0.030648442 |
| DSCR8      | 1.049702626 | 1.001975893 | 1.099702708 | 0.041041917 |
| LINC00623  | 1.115191031 | 0.912330571 | 1.363158351 | 0.287197753 |
| LINC01770  | 0.968007602 | 0.883201579 | 1.060956795 | 0.48700888  |
| AC090587.1 | 1.086844533 | 0.866851971 | 1.362667536 | 0.470480922 |
| BACE1-AS   | 1.254124339 | 1.131598085 | 1.389917391 | 1.58E-05    |
| AP003119.1 | 1.244140419 | 1.076303336 | 1.438149758 | 0.003131762 |
| SNHG25     | 1.014902861 | 0.995231899 | 1.034962622 | 0.138513712 |
| AC120053.1 | 1.142063646 | 0.977807678 | 1.333911976 | 0.093602512 |
| LINC00342  | 1.125287129 | 0.967035937 | 1.309435435 | 0.126889299 |
| AL603839.3 | 1.316163105 | 1.036899123 | 1.670640162 | 0.023961048 |
| AL359921.2 | 1.210090503 | 1.045496924 | 1.400596207 | 0.010575595 |
| PRANCR     | 1.479212962 | 1.103212272 | 1.983363529 | 0.008886453 |
| LINC02062  | 1.445738558 | 0.82760417  | 2.525555156 | 0.195271415 |
| ANKRD10-IT | 1.074638298 | 1.006036979 | 1.147917518 | 0.032452218 |
| AC011477.1 | 1.008459905 | 0.906634335 | 1.121721671 | 0.876724252 |
| AC084036.1 | 1.06199911  | 0.994144154 | 1.134485481 | 0.074160124 |
| AC083843.3 | 1.05975062  | 0.790797034 | 1.420176516 | 0.697617311 |
| AFDN-DT    | 1.375895105 | 1.005489118 | 1.882752687 | 0.046133128 |
| AC131009.3 | 1.13952284  | 0.996161847 | 1.303515394 | 0.056922263 |
| LMNTD2-AS  | 1.072328406 | 0.913652911 | 1.258561317 | 0.392717532 |
| AC090015.1 | 1.001549333 | 0.876978353 | 1.143815082 | 0.981773979 |
| AL360181.1 | 0.978162792 | 0.924124753 | 1.035360696 | 0.446368286 |

|            |             |             |             |             |
|------------|-------------|-------------|-------------|-------------|
| SNHG20     | 1.349153861 | 1.09520734  | 1.661983145 | 0.004881921 |
| AC092171.5 | 1.055948103 | 0.920670157 | 1.211103008 | 0.436394422 |
| LINC01270  | 1.085358102 | 0.883402828 | 1.333482498 | 0.435530622 |
| AC112206.2 | 0.990121667 | 0.906545502 | 1.081402879 | 0.825373224 |
| AL121944.2 | 1.056741971 | 0.927303188 | 1.20424863  | 0.407754261 |
| LINC01836  | 1.053141796 | 0.951746104 | 1.165339829 | 0.316126778 |
| AC055822.1 | 1.300123339 | 0.912865322 | 1.851664921 | 0.145759672 |
| AC009005.1 | 1.188666288 | 1.076401876 | 1.312639429 | 0.000639027 |
| TMEM161B-  | 1.225134748 | 0.967188019 | 1.551875252 | 0.092302315 |
| AC010969.2 | 1.518666777 | 1.182268247 | 1.950782984 | 0.001073414 |
| LINC01503  | 1.011171482 | 0.962623442 | 1.062167947 | 0.658095233 |
| AL132989.1 | 1.064012947 | 0.769657531 | 1.47094455  | 0.707282661 |
| LINC01124  | 1.004587297 | 0.955502519 | 1.056193592 | 0.85788395  |
| AC092171.2 | 1.064162647 | 0.984600019 | 1.150154496 | 0.116759497 |
| PXN-AS1    | 1.332207535 | 1.103866995 | 1.607781485 | 0.00278893  |
| SNHG6      | 1.005056627 | 1.00002667  | 1.010111884 | 0.048794552 |
| AC007448.4 | 1.121357511 | 0.881729265 | 1.426109712 | 0.350408742 |
| ELF3-AS1   | 1.04977083  | 0.96751314  | 1.139022046 | 0.243338609 |
| LINC01138  | 1.414280754 | 1.19593717  | 1.67248757  | 5.09E-05    |
| AC010735.2 | 1.007326979 | 0.789813264 | 1.284743734 | 0.953096246 |
| COA6-AS1   | 1.065361002 | 0.976122646 | 1.16275764  | 0.156041006 |
| AC021078.1 | 1.378170568 | 0.977877497 | 1.942323165 | 0.066924551 |
| NIFK-AS1   | 1.358905063 | 1.119206952 | 1.649938794 | 0.001952187 |
| LINC01287  | 1.013121697 | 0.992166942 | 1.03451902  | 0.221514517 |
| AC026401.3 | 1.082952602 | 1.026868899 | 1.142099386 | 0.003311785 |
| TYMSOS     | 1.040310803 | 0.965009649 | 1.12148782  | 0.302597638 |
| PTOV1-AS1  | 1.260467327 | 1.044249926 | 1.521453669 | 0.015911961 |
| TMEM44-AS  | 1.027793172 | 0.986942804 | 1.07033437  | 0.185235399 |
| UBR5-AS1   | 1.232236583 | 1.00282435  | 1.514130562 | 0.04694493  |
| PRKAR1B-A  | 1.13964496  | 1.003018675 | 1.294881808 | 0.044832308 |
| MALAT1     | 1.02808187  | 0.980570186 | 1.077895644 | 0.251298401 |
| SLC25A25-A | 1.071875866 | 0.962782964 | 1.193330081 | 0.205005551 |
| LINC01151  | 0.976899458 | 0.91827141  | 1.039270678 | 0.459219273 |
| AC068580.1 | 1.355687306 | 1.148834532 | 1.599784843 | 0.000315158 |
| AC009065.5 | 1.132697981 | 0.741683748 | 1.72985416  | 0.564108029 |
| NUP50-DT   | 1.020122142 | 0.946187468 | 1.09983404  | 0.603768556 |
| Z95115.1   | 1.234150453 | 1.060586109 | 1.436118508 | 0.006515638 |
| AC104794.3 | 1.064223077 | 0.986913811 | 1.147588314 | 0.105741652 |
| AC008549.1 | 0.977513973 | 0.958725209 | 0.996670953 | 0.021635027 |
| SLC6A1-AS1 | 0.949782694 | 0.683882448 | 1.319067581 | 0.758500167 |
| AC007298.2 | 0.962870927 | 0.73424717  | 1.262681643 | 0.784416801 |
| DNAJC3-DT  | 1.234812317 | 0.974928391 | 1.563972772 | 0.080227399 |
| AC018904.1 | 1.071307412 | 0.972244219 | 1.18046428  | 0.164113267 |
| AL049840.6 | 1.132539979 | 1.065994158 | 1.203239994 | 5.61E-05    |

|             |             |             |             |             |
|-------------|-------------|-------------|-------------|-------------|
| AC009237.15 | 1.251132728 | 0.94995255  | 1.647801359 | 0.110811774 |
| AL021807.1  | 1.054808463 | 0.792415481 | 1.404087781 | 0.714637371 |
| AC124798.1  | 1.270448485 | 1.127400055 | 1.431647395 | 8.59E-05    |
| HCG18       | 1.355818916 | 1.005307208 | 1.828540489 | 0.046081281 |
| NRAV        | 1.261006079 | 1.122923168 | 1.416068683 | 8.88E-05    |
| LINC02506   | 1.017785003 | 0.974447745 | 1.063049629 | 0.427165608 |
| AC040970.1  | 1.267648874 | 1.053626923 | 1.525144843 | 0.011949852 |
| PITPNA-AS1  | 1.100883236 | 1.026204587 | 1.180996378 | 0.00732497  |
| AL162582.1  | 1.014892485 | 0.977076587 | 1.054171975 | 0.445460524 |
