# Supplementary material for: Identification of Epithelial Mesenchymal Transition-Related lncRNAs Associated with Prognosis and Tumor Immune Microenvironment of Hepatocellular Carcinoma
Source: Hindawi journal article supplement (doi:10.1155/2022/6335155), 2022-01-15
Supplement: f3 [file 6335155.f3.pdf]

| Id          | HR          | HR.95L      | HR.95H      | P-value     |
|-------------|-------------|-------------|-------------|-------------|
| SNHG15      | 1.074725699 | 0.975636892 | 1.183878282 | 0.144234589 |
| AL354733.3  | 1.046930907 | 0.757986802 | 1.446020327 | 0.780753323 |
| MUC12-AS1   | 1.184441727 | 0.966961385 | 1.450835811 | 0.101969997 |
| AC006042.1  | 1.0999907   | 0.928476411 | 1.303188241 | 0.270498368 |
| VPS13B-DT   | 1.067378406 | 0.982212007 | 1.159929478 | 0.124312835 |
| AP006621.2  | 1.0546918   | 0.967343055 | 1.149927926 | 0.227345928 |
| THUMPD3-AS  | 1.349839382 | 1.160812116 | 1.569647949 | 9.73E-05    |
| AC025265.1  | 1.287555127 | 1.115988131 | 1.48549806  | 0.000532174 |
| AC022613.1  | 0.986346139 | 0.939634862 | 1.035379535 | 0.578625746 |
| AL451165.2  | 1.04777721  | 0.987761267 | 1.111439695 | 0.120953053 |
| AL359513.1  | 1.463920306 | 1.140860726 | 1.878461248 | 0.002736547 |
| LINC02428   | 0.994955868 | 0.966913706 | 1.0238113   | 0.728830256 |
| AC005586.1  | 1.048879473 | 0.813270667 | 1.352745396 | 0.713137072 |
| MYLK-AS1    | 1.333356346 | 1.081456693 | 1.64393004  | 0.007082043 |
| LINC00942   | 1.02329824  | 0.994897901 | 1.052509295 | 0.108765091 |
| LINC00886   | 1.001555432 | 0.876441888 | 1.144529143 | 0.98178703  |
| AL355353.2  | 1.110140363 | 1.031771431 | 1.194461862 | 0.005152877 |
| ZNF529-AS1  | 1.401313853 | 1.153539645 | 1.702308649 | 0.000676947 |
| ZNF213-AS1  | 1.196990034 | 0.981940761 | 1.459136027 | 0.07514202  |
| LINC00896   | 1.301887673 | 1.021703442 | 1.658907511 | 0.032874429 |
| AC073611.1  | 1.630015743 | 1.27619814  | 2.081926967 | 9.10E-05    |
| AL135905.1  | 1.02753515  | 0.997240094 | 1.058750537 | 0.075246105 |
| TAT-AS1     | 0.984305407 | 0.881365044 | 1.099268846 | 0.778958256 |
| DANCR       | 1.016095029 | 1.001676306 | 1.030721304 | 0.028549213 |
| AL645933.3  | 1.00918613  | 0.903400548 | 1.127358897 | 0.871423385 |
| SNHG12      | 1.100829249 | 1.016704582 | 1.191914599 | 0.01786495  |
| LINC01139   | 1.021137589 | 0.994511052 | 1.048477013 | 0.120742055 |
| AC093673.1  | 1.022096935 | 0.993830922 | 1.051166875 | 0.126640049 |
| AC005586.2  | 1.049573129 | 0.852245022 | 1.292590423 | 0.648869068 |
| LINC01942   | 0.948864107 | 0.8232417   | 1.09365584  | 0.468812919 |
| LNCTAM34A   | 0.882877418 | 0.681837393 | 1.143194173 | 0.344723778 |
| SNHG8       | 1.005639221 | 1.000019245 | 1.011290781 | 0.04921844  |
| AL161669.3  | 1.058465128 | 0.98304244  | 1.139674527 | 0.13193847  |
| TMPO-AS1    | 1.153000696 | 1.019577553 | 1.303883751 | 0.023270582 |
| MAN1B1-DT   | 1.113381995 | 0.74987224  | 1.653107557 | 0.594324756 |
| AL139384.1  | 1.189134396 | 1.070639807 | 1.320743543 | 0.001218841 |
| AZIN1-AS1   | 1.217599845 | 0.939203097 | 1.578518414 | 0.137169514 |
| AC112491.1  | 1.049779324 | 1.018975273 | 1.081514595 | 0.001388586 |
| AC068987.3  | 1.106652672 | 1.035236792 | 1.182995182 | 0.002906888 |
| AC010547.2  | 0.998694542 | 0.963128609 | 1.035573835 | 0.943711187 |
| AC016405.3  | 1.483571512 | 1.217636949 | 1.807586764 | 9.09E-05    |
| AL606489.1  | 1.128339905 | 0.983206504 | 1.294896785 | 0.085637361 |
| ZSCAN16-AS1 | 1.018119604 | 0.987397717 | 1.049797371 | 0.25068025  |

|             |             |             |             |             |
|-------------|-------------|-------------|-------------|-------------|
| AC009407.1  | 1.006191006 | 0.991198104 | 1.021410691 | 0.420379593 |
| AC090589.3  | 1.039672393 | 0.796892705 | 1.356416841 | 0.774317754 |
| ZFPM2-AS1   | 1.124656613 | 1.07516917  | 1.176421844 | 3.11E-07    |
| AC012510.1  | 1.241528123 | 1.064402397 | 1.448129095 | 0.005875187 |
| RAB30-DT    | 1.07840053  | 0.959321925 | 1.212260109 | 0.206111896 |
| AC011468.1  | 1.201078763 | 1.039278243 | 1.388069272 | 0.013071011 |
| LINC01671   | 1.150339935 | 1.005508231 | 1.316032952 | 0.041353055 |
| AL355102.4  | 1.008810483 | 0.984696078 | 1.03351543  | 0.477325706 |
| ZNF710-AS1  | 0.960829178 | 0.877984545 | 1.051490843 | 0.38507884  |
| ASMTL-AS1   | 1.034857077 | 0.977523002 | 1.095553934 | 0.23870795  |
| AC020765.2  | 1.696661349 | 1.274740579 | 2.258231815 | 0.000290136 |
| AC015982.2  | 1.183569435 | 0.900526651 | 1.555574848 | 0.226817541 |
| AC007099.1  | 1.020181965 | 0.994803411 | 1.046207954 | 0.120042302 |
| AL031673.1  | 1.113559531 | 1.022100616 | 1.213202311 | 0.013897887 |
| SNHG32      | 1.007395572 | 1.00172245  | 1.013100822 | 0.01055072  |
| RUSC1-AS1   | 1.124370312 | 1.024305482 | 1.234210516 | 0.01370355  |
| AC008771.1  | 1.072146358 | 0.981161684 | 1.171568185 | 0.123648259 |
| CRIM1-DT    | 0.990593205 | 0.949172197 | 1.033821788 | 0.664518224 |
| LINC01004   | 1.168002748 | 0.915718932 | 1.489791651 | 0.21100431  |
| DLG5-AS1    | 1.04729626  | 0.94757105  | 1.15751685  | 0.365388352 |
| MUC20-OT1   | 1.253637925 | 0.912904448 | 1.721547144 | 0.162453863 |
| AP000894.4  | 1.142160306 | 1.010068759 | 1.2915261   | 0.034028834 |
| ZEB1-AS1    | 1.206326234 | 0.962464094 | 1.511976386 | 0.103539163 |
| ZNF503-AS2  | 1.321310241 | 1.031975986 | 1.691764902 | 0.027134765 |
| AL445524.1  | 1.002049825 | 0.995063714 | 1.009084984 | 0.566196916 |
| AL354836.1  | 0.993024681 | 0.897824276 | 1.09831962  | 0.891718989 |
| AP002748.4  | 1.275830276 | 1.01383064  | 1.605537287 | 0.037793626 |
| lnc-CCNY-1  | 1.664242177 | 1.348328568 | 2.054174397 | 2.11E-06    |
| ZNF793-AS1  | 1.119976507 | 0.996757154 | 1.258428265 | 0.05673527  |
| FAM99B      | 0.979677551 | 0.939864712 | 1.021176869 | 0.332062701 |
| AC009022.1  | 0.966547712 | 0.669453016 | 1.395489238 | 0.855916204 |
| AL162413.1  | 1.007254299 | 0.990715689 | 1.024068997 | 0.39216207  |
| AL035071.1  | 1.073201239 | 1.00910374  | 1.141370161 | 0.024551325 |
| AC012146.1  | 1.184235891 | 1.049876383 | 1.335790259 | 0.005920998 |
| AC009275.1  | 1.173557405 | 1.025371232 | 1.343159375 | 0.020138607 |
| AP001372.2  | 1.153972111 | 0.886898384 | 1.501470358 | 0.286289584 |
| AL358472.2  | 1.386160443 | 1.058109755 | 1.815918211 | 0.017792533 |
| AC139530.1  | 1.245641733 | 1.074417979 | 1.444152421 | 0.003598602 |
| AC022424.1  | 1.031963479 | 0.997810969 | 1.067284941 | 0.066900678 |
| AL354892.2  | 1.105128154 | 1.017736893 | 1.200023547 | 0.017394672 |
| KCNMB2-AS1  | 1.21018977  | 1.074196844 | 1.363399351 | 0.001708146 |
| MID1IP1-AS1 | 0.917377387 | 0.781377375 | 1.077048423 | 0.292183897 |
| NOP14-AS1   | 1.054780821 | 0.798841596 | 1.392719891 | 0.706834725 |
| C2-AS1      | 0.868863107 | 0.659488252 | 1.144710459 | 0.317679036 |

|             |             |             |             |             |
|-------------|-------------|-------------|-------------|-------------|
| AC068888.1  | 1.018514712 | 0.85500945  | 1.213287429 | 0.837198199 |
| BX322562.1  | 1.023027034 | 0.968803671 | 1.080285246 | 0.412594969 |
| SNHG19      | 1.004352838 | 0.998516774 | 1.010223013 | 0.144081667 |
| AL121899.1  | 1.036313585 | 0.976634546 | 1.099639421 | 0.238518963 |
| AC007773.1  | 1.371982741 | 1.14944273  | 1.637608026 | 0.000461101 |
| LINC02298   | 1.013659526 | 0.869954128 | 1.181103234 | 0.861919267 |
| PARD3-AS1   | 1.376293173 | 1.07742671  | 1.758061946 | 0.010557919 |
| AC145207.5  | 1.607560303 | 1.271640562 | 2.032217439 | 7.21E-05    |
| AC087741.1  | 1.409133952 | 1.074931217 | 1.847242375 | 0.013024746 |
| AC024075.1  | 0.891836054 | 0.634309086 | 1.253917946 | 0.510251472 |
| AC022144.1  | 1.074382649 | 1.005787072 | 1.147656505 | 0.033057292 |
| AL360181.2  | 1.023648034 | 0.80208757  | 1.306410093 | 0.851022486 |
| AC027644.3  | 1.076994575 | 1.011653154 | 1.146556317 | 0.020191344 |
| LINC00513   | 1.186468862 | 1.028805928 | 1.368293399 | 0.018756332 |
| BAIAP2-DT   | 1.019635872 | 0.982093116 | 1.058613786 | 0.309659031 |
| SNHG10      | 1.256979927 | 1.085253837 | 1.455879244 | 0.002276607 |
| AC004687.1  | 1.040425795 | 0.869988873 | 1.244252506 | 0.664171801 |
| STPG3-AS1   | 0.986030636 | 0.815671447 | 1.191970638 | 0.884421591 |
| SNHG29      | 1.004020853 | 0.999862565 | 1.008196435 | 0.058085085 |
| AC023043.4  | 1.010809596 | 0.866660449 | 1.178934656 | 0.891061813 |
| MAP3K2-DT   | 1.162728376 | 1.028204329 | 1.314852737 | 0.016246509 |
| AC027307.2  | 1.016841972 | 0.980261738 | 1.054787264 | 0.371600185 |
| KMT2E-AS1   | 1.039611496 | 0.997038459 | 1.08400238  | 0.06861639  |
| BX537318.1  | 1.167746397 | 0.979022996 | 1.392849456 | 0.084663575 |
| AC020915.3  | 1.504521054 | 1.2282934   | 1.842868814 | 7.92E-05    |
| AL356234.2  | 0.920044424 | 0.803392506 | 1.053634104 | 0.228322505 |
| AL392172.1  | 1.071106609 | 1.029000315 | 1.114935876 | 0.000787685 |
| CCDC18-AS1  | 1.189324991 | 0.99715399  | 1.418531086 | 0.05382184  |
| AC138696.2  | 1.082432574 | 1.017383687 | 1.15164052  | 0.012245598 |
| MINCR       | 1.087581945 | 1.026674335 | 1.152102909 | 0.004300663 |
| RPARP-AS1   | 1.330041212 | 1.099528682 | 1.608879927 | 0.003313651 |
| AC103691.1  | 1.281221314 | 1.072621977 | 1.530388235 | 0.006272711 |
| LINC00685   | 1.17730767  | 1.015162854 | 1.365350736 | 0.030849013 |
| AL139287.1  | 1.086849079 | 1.012269839 | 1.166922963 | 0.021664531 |
| ALDH1L1-AS2 | 1.062987486 | 0.828992283 | 1.363031258 | 0.630141592 |
| AC040977.1  | 1.017867628 | 0.944294577 | 1.097172993 | 0.643620165 |
| CYTOR       | 1.025168081 | 0.991808032 | 1.059650214 | 0.140850547 |
| AC115618.2  | 1.002228711 | 0.941309159 | 1.067090849 | 0.944528219 |
| MELTF-AS1   | 1.10965908  | 1.004030628 | 1.226400111 | 0.041471971 |
| SNHG1       | 1.02923963  | 1.005320127 | 1.053728249 | 0.016295365 |
| AC104113.1  | 1.586190597 | 1.310568441 | 1.919778114 | 2.17E-06    |
| GPRC5D-AS1  | 0.920344225 | 0.661930307 | 1.279641504 | 0.621572908 |
| LINC01857   | 1.049504445 | 0.941589859 | 1.169787004 | 0.382773126 |
| AC010331.1  | 1.406534205 | 1.050436768 | 1.88334846  | 0.022002042 |

|            |             |             |             |             |
|------------|-------------|-------------|-------------|-------------|
| AC005332.4 | 1.437382925 | 1.134365724 | 1.82134353  | 0.002667369 |
| AC000123.1 | 1.207009566 | 0.928563376 | 1.568952782 | 0.159703709 |
| AL035461.3 | 1.085585766 | 1.025442647 | 1.149256332 | 0.004743662 |
| AL022328.2 | 1.090127136 | 0.972523844 | 1.221951709 | 0.138442777 |
| CAMTA1-DT  | 1.284079833 | 0.959051213 | 1.719262742 | 0.093116948 |
| AL118516.1 | 1.077742247 | 1.009538204 | 1.150554131 | 0.024796017 |
| AC132872.1 | 1.133510403 | 1.048298986 | 1.225648265 | 0.001672673 |
| SREBF2-AS1 | 1.331887398 | 1.093063743 | 1.622891668 | 0.004475674 |
| AC147067.1 | 1.036296054 | 0.875582789 | 1.226508247 | 0.678388714 |
| AC091271.1 | 1.100618961 | 0.975647118 | 1.241598601 | 0.11898573  |
| AC020978.4 | 1.000606506 | 0.960120072 | 1.042800176 | 0.977046581 |
| AC124016.3 | 1.326005306 | 1.043436427 | 1.685095541 | 0.021015521 |
| FAM111A-DT | 1.186802209 | 0.849339083 | 1.658347662 | 0.31570896  |
| AL022328.1 | 1.256113613 | 0.953043515 | 1.655560722 | 0.105539149 |
| TMEM147-AS | 1.290308125 | 1.036247862 | 1.606657169 | 0.02271301  |
| AC012313.1 | 1.098554525 | 0.822314301 | 1.467592188 | 0.524722431 |
| AP000424.2 | 0.938177413 | 0.813856335 | 1.081489227 | 0.37893217  |
| NCK1-DT    | 1.191107955 | 0.937677903 | 1.513033587 | 0.15192267  |
| AL158071.3 | 1.199463959 | 0.931780718 | 1.544047608 | 0.158075876 |
| AL928654.2 | 1.087565953 | 0.886345513 | 1.334467975 | 0.421304573 |
| AC019117.2 | 1.01923753  | 0.963601517 | 1.078085831 | 0.505836047 |
| AC068473.5 | 1.240211774 | 1.037604367 | 1.482381236 | 0.018001182 |
| SNHG7      | 1.030097024 | 1.00829984  | 1.052365415 | 0.006579095 |
| CR936218.2 | 0.88377659  | 0.737720681 | 1.058749038 | 0.180066953 |
| LINC00957  | 1.02297161  | 0.809742706 | 1.292349912 | 0.848968567 |
| CD2BP2-DT  | 1.09859138  | 1.010602521 | 1.194241055 | 0.027273843 |
| LINC01963  | 1.015279406 | 0.78446758  | 1.314002386 | 0.908259178 |
| AC015813.1 | 1.021051338 | 0.879287415 | 1.18567128  | 0.784726947 |
| AL023803.1 | 1.079967456 | 0.988046535 | 1.180440055 | 0.090073871 |
| AC006504.7 | 1.445341015 | 1.211911759 | 1.723731645 | 4.16E-05    |
| APTR       | 1.083748818 | 0.961456132 | 1.221596556 | 0.187993559 |
| LINC00106  | 1.028269031 | 0.940622409 | 1.124082512 | 0.539689118 |
| SNHG9      | 1.012768413 | 0.997166422 | 1.028614517 | 0.109214557 |
| TAF1A-AS1  | 0.983680273 | 0.832780533 | 1.161923029 | 0.846443973 |
| AC008267.5 | 1.010176085 | 0.971419686 | 1.050478734 | 0.611985454 |
| AC009065.9 | 1.119581501 | 0.922469737 | 1.358811772 | 0.252954514 |
| AC008610.1 | 1.130695311 | 1.000870864 | 1.277359479 | 0.048387099 |
| AL161668.4 | 0.995523826 | 0.956488936 | 1.036151753 | 0.826009985 |
| AC026462.3 | 0.999176767 | 0.969714838 | 1.02953381  | 0.956989194 |
| EIF3J-DT   | 1.03202119  | 0.823744262 | 1.292959216 | 0.784040433 |
| PURPL      | 1.044217138 | 0.872122723 | 1.250270636 | 0.637723822 |
| LINC01980  | 1.058634669 | 1.005629125 | 1.114434074 | 0.029693989 |
| MIR210HG   | 1.117498576 | 1.027999657 | 1.214789382 | 0.009098577 |
| OTUD6B-AS1 | 1.074757995 | 0.955508548 | 1.20889002  | 0.229558293 |

|             |             |             |             |             |
|-------------|-------------|-------------|-------------|-------------|
| AC016394.2  | 1.703897466 | 1.340242822 | 2.166224304 | 1.36E-05    |
| AL031058.1  | 1.023865259 | 0.996999672 | 1.051454777 | 0.08212737  |
| AC009237.14 | 1.042938292 | 0.942204993 | 1.154441219 | 0.417230173 |
| AC010761.1  | 1.540094729 | 1.257929097 | 1.885552835 | 2.89E-05    |
| AP001505.1  | 1.068203764 | 1.03390591  | 1.103639385 | 7.42E-05    |
| AC132872.3  | 1.232151877 | 0.922211783 | 1.646257699 | 0.157899327 |
| AC022150.2  | 1.110806698 | 0.866975538 | 1.423213766 | 0.405932175 |
| AC083880.1  | 1.169817256 | 0.893525862 | 1.53154203  | 0.253871914 |
| AC016888.1  | 1.00285273  | 0.969007668 | 1.037879917 | 0.870810477 |
| LINC01003   | 1.045982954 | 0.922768337 | 1.185650066 | 0.482034173 |
| AL359643.3  | 1.238560445 | 0.982548492 | 1.561278644 | 0.070149473 |
| AC079305.2  | 0.98811974  | 0.900227149 | 1.084593617 | 0.801465929 |
| MAPKAPK5-A  | 1.119423187 | 1.045588663 | 1.198471555 | 0.001193214 |
| AC004540.2  | 1.003355922 | 0.903028755 | 1.114829512 | 0.950300526 |
| AP000593.3  | 0.966113082 | 0.919940301 | 1.014603323 | 0.167668085 |
| AP000254.2  | 1.103605804 | 1.004505077 | 1.21248344  | 0.040014479 |
| LINC02806   | 0.952260799 | 0.868604412 | 1.043974238 | 0.297103426 |
| AC060780.1  | 0.955773875 | 0.826570407 | 1.105173488 | 0.541575628 |
| SNHG14      | 1.108795347 | 0.928477052 | 1.324133018 | 0.254093575 |
| AL589765.4  | 1.047908116 | 0.92802107  | 1.183282854 | 0.45030703  |
| AC087482.1  | 1.002893662 | 0.988417012 | 1.017582341 | 0.696910213 |
| AC027796.4  | 1.013152653 | 0.865260529 | 1.186322807 | 0.87106411  |
| LINC00221   | 1.057955952 | 0.975266503 | 1.147656352 | 0.17484053  |
| AL391427.1  | 1.060484103 | 1.026648046 | 1.095435321 | 0.000385846 |
| LINC00665   | 1.088032401 | 1.00550638  | 1.17733167  | 0.036045962 |
| PTOV1-AS2   | 1.126238299 | 1.007898622 | 1.258472507 | 0.035828785 |
| SNHG11      | 1.045861466 | 1.020299877 | 1.07206345  | 0.000382626 |
| PPP1R14B-AS | 1.036507805 | 0.911455867 | 1.178716897 | 0.584638522 |
| AL121832.2  | 1.066993369 | 0.989769608 | 1.150242279 | 0.090704144 |
| AC005920.4  | 0.983670365 | 0.900380297 | 1.074665216 | 0.715306944 |
| AC010542.6  | 1.191006109 | 0.955280528 | 1.484899473 | 0.120329415 |
| HEIH        | 1.026465379 | 0.998355675 | 1.055366539 | 0.065212056 |
| AC107375.1  | 1.373289045 | 1.136829261 | 1.658932317 | 0.001001484 |
| AL391056.1  | 1.1333865   | 1.042557194 | 1.232129005 | 0.003305192 |
| FOXD2-AS1   | 1.116773305 | 1.026110012 | 1.215447271 | 0.010569467 |
| LINC01089   | 1.275907173 | 1.071600886 | 1.519165518 | 0.006206385 |
| AL355802.3  | 1.577144137 | 1.127283078 | 2.206529733 | 0.007831478 |
| LINC01436   | 1.054025331 | 1.012427631 | 1.097332159 | 0.010432199 |
| MAGI2-AS3   | 0.85686371  | 0.707724044 | 1.037431784 | 0.113350434 |
| AC092171.3  | 1.092535855 | 0.906066413 | 1.317380909 | 0.353990154 |
| AL591895.1  | 1.009203948 | 0.996963879 | 1.021594294 | 0.141138556 |
| AC074117.1  | 1.279242032 | 1.031940339 | 1.585808903 | 0.024651962 |
| LINC02163   | 1.04952296  | 0.928349862 | 1.186512207 | 0.439991178 |
| PVT1        | 1.254859816 | 1.106642136 | 1.422928972 | 0.000400085 |

|             |             |             |             |             |
|-------------|-------------|-------------|-------------|-------------|
| AC125257.1  | 1.14736112  | 1.011999315 | 1.300828488 | 0.031857799 |
| AC008764.2  | 0.973399284 | 0.812760508 | 1.165787653 | 0.769532448 |
| RNASEH1-AS1 | 1.034287851 | 0.930825727 | 1.149249885 | 0.530702723 |
| NRSN2-AS1   | 1.019195589 | 0.832248039 | 1.248137094 | 0.854088361 |
| AC009283.1  | 1.086629227 | 1.025947586 | 1.150900001 | 0.004601365 |
| CHKB-DT     | 1.29413229  | 1.100413473 | 1.521953726 | 0.001829977 |
| PANK2-AS1   | 1.28169379  | 0.938918004 | 1.749608553 | 0.118046468 |
| LINC01484   | 1.32248512  | 0.968901703 | 1.805102506 | 0.078249701 |
| GIHCG       | 1.128602996 | 1.031596057 | 1.234732058 | 0.008331034 |
| SNHG17      | 1.052435302 | 1.003723689 | 1.103510934 | 0.034542368 |
| ST8SIA6-AS1 | 1.059780337 | 0.991279852 | 1.133014417 | 0.088556266 |
| AC104825.1  | 1.069778959 | 0.88456546  | 1.293773127 | 0.486802925 |
| LINC00294   | 1.168918652 | 1.02376448  | 1.334653469 | 0.021047131 |
| AC006449.7  | 1.167081178 | 0.963591149 | 1.413543989 | 0.113978626 |
| AC006213.4  | 1.295084338 | 1.131794377 | 1.481933004 | 0.000169619 |
| AC084824.6  | 1.218590452 | 0.99015153  | 1.499732762 | 0.06196871  |
| AC015849.3  | 1.153002606 | 0.846432685 | 1.570609256 | 0.366651047 |
| AC111000.4  | 0.992290791 | 0.940575384 | 1.046849652 | 0.776877392 |
| RAD51-AS1   | 1.148899787 | 0.948216564 | 1.392056173 | 0.156451313 |
| AC024060.2  | 1.160732721 | 1.057019863 | 1.274621695 | 0.001801318 |
| POLR2J4     | 1.158924744 | 0.905172498 | 1.483812827 | 0.242087188 |
| MHENCRC     | 1.091950923 | 1.030794861 | 1.156735315 | 0.00277724  |
| LINC01474   | 1.00408561  | 0.992861985 | 1.01543611  | 0.477136319 |
| AL031186.1  | 1.131300851 | 0.863638767 | 1.481917746 | 0.370440602 |
| AC005229.4  | 1.167386833 | 0.991521982 | 1.374444583 | 0.063202568 |
| AP000759.1  | 0.90870651  | 0.773715907 | 1.067248991 | 0.24331202  |
| AC074212.1  | 1.04318128  | 0.866961053 | 1.255220381 | 0.654304536 |
| BX284668.5  | 1.020175856 | 1.000973285 | 1.039746806 | 0.039369514 |
| AL391244.2  | 1.25896051  | 0.983882293 | 1.610946326 | 0.067132811 |
| AL355488.1  | 1.072989299 | 0.953306822 | 1.20769726  | 0.243009109 |
| AC008915.3  | 1.128610315 | 0.988298846 | 1.288842185 | 0.074067674 |
| AP003119.2  | 1.07802749  | 0.988072894 | 1.176171592 | 0.091016502 |
| AL160006.1  | 0.991501851 | 0.798304488 | 1.231454834 | 0.938480481 |
| GLIS2-AS1   | 1.017471634 | 0.932818073 | 1.109807536 | 0.695937482 |
| AL844908.2  | 1.102059761 | 0.843961937 | 1.439088262 | 0.475330633 |
| SBF2-AS1    | 1.301823631 | 1.018616243 | 1.66377159  | 0.035089084 |
| MIR4458HG   | 1.156908783 | 1.036010189 | 1.291915801 | 0.009648837 |
| AL118558.3  | 1.122618706 | 0.930101661 | 1.354983882 | 0.228190477 |
| ASH1L-AS1   | 1.05630276  | 0.843027516 | 1.323533928 | 0.634061114 |
| AC012645.1  | 1.251717702 | 0.919784152 | 1.703440097 | 0.153263066 |
| AL021707.6  | 1.070725203 | 0.956728427 | 1.198305003 | 0.234130512 |
| AC092535.5  | 1.0143297   | 0.993650795 | 1.035438954 | 0.175776269 |
| AC009686.2  | 1.221594277 | 0.984215868 | 1.516224871 | 0.069425228 |
| LINC01176   | 1.081106755 | 0.932554233 | 1.253323156 | 0.301106283 |

|             |             |             |             |             |
|-------------|-------------|-------------|-------------|-------------|
| AP003352.1  | 1.297936905 | 1.155072095 | 1.458471913 | 1.17E-05    |
| C2CD4D-AS1  | 1.028179862 | 0.981163484 | 1.077449217 | 0.244553096 |
| AC242426.2  | 1.445742305 | 1.071310723 | 1.951040689 | 0.015935877 |
| AC099508.2  | 0.763602355 | 0.59941065  | 0.972769763 | 0.029001359 |
| AC026740.1  | 1.029760661 | 0.983601566 | 1.07808594  | 0.210085587 |
| AC022784.1  | 1.018037825 | 0.988114438 | 1.048867392 | 0.240213826 |
| LINC01006   | 1.059604333 | 0.943334806 | 1.190204512 | 0.328923126 |
| SNHG3       | 1.05193912  | 1.019203463 | 1.08572621  | 0.001693899 |
| AC004918.5  | 1.138200919 | 0.93223289  | 1.389675634 | 0.203735386 |
| AL355574.1  | 1.258628674 | 1.027219563 | 1.542168973 | 0.02648384  |
| SCAMP1-AS1  | 1.133299285 | 0.97899834  | 1.311919761 | 0.093792224 |
| AL512598.1  | 1.089121494 | 0.966199724 | 1.227681607 | 0.162349345 |
| DLGAP1-AS1  | 1.07953559  | 1.010430405 | 1.153367005 | 0.023366683 |
| MIR4435-2HG | 1.070396789 | 0.980014557 | 1.169114558 | 0.130676117 |
| AP002360.2  | 1.053675652 | 1.006244688 | 1.103342351 | 0.026090121 |
| AC013275.1  | 0.968546859 | 0.888516605 | 1.055785579 | 0.467664364 |
| LINC00847   | 1.064623718 | 0.994458058 | 1.139740034 | 0.071828377 |
| VPS9D1-AS1  | 1.123680176 | 1.019764859 | 1.238184594 | 0.018508633 |
| LINC02041   | 0.990055124 | 0.932237764 | 1.051458314 | 0.74476565  |
| PRRT3-AS1   | 1.175259913 | 1.083471144 | 1.27482478  | 9.93E-05    |
| AC010883.1  | 1.073006176 | 0.947680317 | 1.214905738 | 0.266157515 |
| PSORS1C3    | 1.021781537 | 0.875147153 | 1.192985096 | 0.785140809 |
| AC106820.3  | 1.155604191 | 1.018465755 | 1.311208589 | 0.024842087 |
| AC136475.2  | 0.99341336  | 0.85965594  | 1.14798265  | 0.9286336   |
| AC026471.4  | 1.040976953 | 0.902942563 | 1.200112898 | 0.580052071 |
| AC016773.2  | 1.4180481   | 1.095618739 | 1.835365115 | 0.007959183 |
| LINC02604   | 1.102618402 | 0.953482674 | 1.275080684 | 0.187664141 |
| AC007038.1  | 1.309920724 | 1.019786554 | 1.682599457 | 0.034571338 |
| AC010326.3  | 1.095208246 | 1.014935531 | 1.181829847 | 0.019196731 |
| AC243964.3  | 1.016199429 | 0.980378542 | 1.053329132 | 0.380127513 |
| ARRDC1-AS1  | 1.057771652 | 0.961484975 | 1.163700833 | 0.248750902 |
| MMP25-AS1   | 0.976698551 | 0.751007225 | 1.270214224 | 0.860400827 |
| GAS5        | 1.008080919 | 1.003568034 | 1.012614098 | 0.00043839  |
| LINC01186   | 1.123405085 | 0.926655204 | 1.361929422 | 0.236197606 |
| AC132192.2  | 1.214959443 | 1.045678189 | 1.411645058 | 0.010977653 |
| AC007405.4  | 1.05315583  | 0.955844297 | 1.160374348 | 0.295096114 |
| HCP5        | 0.97484229  | 0.949939762 | 1.000397634 | 0.05362509  |
| AP002761.4  | 1.064318309 | 0.893653926 | 1.267575099 | 0.484522256 |
| AC009779.3  | 1.065027897 | 0.97841071  | 1.159313171 | 0.14548408  |
| IDH1-AS1    | 1.185333174 | 1.019793808 | 1.377743935 | 0.026735983 |
| AL162595.1  | 0.842774684 | 0.610764966 | 1.162917337 | 0.29776894  |
| LINC00853   | 1.047381904 | 0.968489226 | 1.132701142 | 0.24660843  |
| LENG8-AS1   | 1.197752769 | 0.988157674 | 1.451804437 | 0.065976697 |
| AC008443.5  | 1.170545361 | 1.064576965 | 1.287061891 | 0.001144031 |

|            |             |             |             |             |
|------------|-------------|-------------|-------------|-------------|
| AC005261.3 | 1.153084584 | 1.036950262 | 1.282225489 | 0.008541682 |
| AC022306.2 | 1.20782334  | 1.014555094 | 1.437908331 | 0.033805159 |
| AC142472.1 | 1.246586365 | 0.963945575 | 1.612100938 | 0.092945049 |
| SNHG21     | 1.390705754 | 1.017016299 | 1.901702555 | 0.038862276 |
| AC011445.2 | 1.029295559 | 1.010088767 | 1.048867567 | 0.002660544 |
| AC005840.4 | 0.984885935 | 0.711782859 | 1.362775588 | 0.926766795 |
| NEAT1      | 1.003331558 | 0.988562077 | 1.0183217   | 0.660242724 |
| AC016394.3 | 1.374524197 | 1.161830302 | 1.626155528 | 0.000208296 |
| AC012313.9 | 0.946399517 | 0.833949949 | 1.074011751 | 0.393316672 |
| AC103706.1 | 1.155401852 | 1.043422612 | 1.27939861  | 0.005482915 |
| ARHGAP27P1 | 1.2962629   | 1.016632263 | 1.652807576 | 0.036347651 |
| AC068580.3 | 1.176980664 | 1.016927261 | 1.36222475  | 0.028885658 |
| AL590666.2 | 0.993121464 | 0.926139206 | 1.064948158 | 0.846382774 |
| PRR34-AS1  | 1.049735995 | 1.010922228 | 1.090039995 | 0.011567216 |
| ST7-AS1    | 1.182805286 | 0.797628117 | 1.753985741 | 0.403625031 |
| TBX2-AS1   | 1.011040208 | 0.859465215 | 1.189346916 | 0.894595778 |
| AC005332.5 | 1.188282507 | 1.06728922  | 1.322992203 | 0.001640927 |
| AL359504.1 | 1.387876368 | 1.079909267 | 1.783669121 | 0.0104518   |
| LINC02035  | 0.968019541 | 0.726738157 | 1.289407778 | 0.824149825 |
| LINC02027  | 1.046243069 | 0.97718646  | 1.120179828 | 0.194440473 |
| AP003486.1 | 0.836483512 | 0.616782429 | 1.134443253 | 0.250746559 |
| AC012467.2 | 1.560983115 | 1.179406342 | 2.066012535 | 0.001847159 |
| AC006026.3 | 1.375028547 | 1.082251982 | 1.747008586 | 0.009133564 |
| AC010973.2 | 1.548796042 | 1.124758888 | 2.132696354 | 0.007356425 |
| ITGB1-DT   | 1.0125959   | 0.991217757 | 1.034435117 | 0.250253576 |
| AL365181.3 | 1.016863538 | 0.983197164 | 1.051682706 | 0.330304593 |
| AC011700.1 | 0.994264568 | 0.737418233 | 1.340571722 | 0.969908129 |
| AC008735.2 | 1.113210327 | 1.013856489 | 1.222300439 | 0.02454602  |
| AC068506.1 | 1.135387165 | 1.009168429 | 1.277392333 | 0.034707622 |
| AC011477.2 | 1.024358438 | 0.968798686 | 1.083104493 | 0.397629431 |
| AL121845.4 | 1.036425016 | 0.988497879 | 1.08667589  | 0.138591515 |
| U91328.1   | 1.048698163 | 0.855291793 | 1.285839344 | 0.647563837 |
| AC005332.3 | 1.121138642 | 1.071482532 | 1.173095983 | 7.53E-07    |
| AL050341.2 | 1.05670134  | 0.961341646 | 1.161520181 | 0.253064791 |
| AC005261.1 | 1.066053911 | 0.997955262 | 1.138799489 | 0.057539461 |
| AC139100.2 | 1.226954063 | 1.028291398 | 1.46399773  | 0.023236224 |
| AC012615.1 | 1.156764751 | 0.979744047 | 1.365769655 | 0.085709342 |
| ASB16-AS1  | 1.038931553 | 0.932614216 | 1.157368988 | 0.488061176 |
| AL109615.3 | 0.971454508 | 0.88309295  | 1.068657451 | 0.551698867 |
| LINC01549  | 0.994104704 | 0.967373292 | 1.021574784 | 0.670727677 |
| AC087741.2 | 1.202957816 | 1.077980914 | 1.342424054 | 0.000961215 |
| ZNF687-AS1 | 0.986119053 | 0.901956546 | 1.078134851 | 0.758766182 |
| AC007566.1 | 1.02827308  | 0.774739883 | 1.364774875 | 0.846944224 |
| Z98257.1   | 1.108214543 | 1.035067231 | 1.186531112 | 0.003185365 |



|            |             |             |             |             |
|------------|-------------|-------------|-------------|-------------|
| AJ009632.2 | 0.99445883  | 0.945060083 | 1.046439673 | 0.830740618 |
| CEBPA-DT   | 1.06993896  | 1.031022224 | 1.110324639 | 0.000348787 |
| AC026369.2 | 1.212560332 | 0.985633264 | 1.491733906 | 0.068290884 |
| AL162411.1 | 1.071218507 | 1.014874405 | 1.130690736 | 0.012576293 |
| AC008608.2 | 1.164929974 | 1.05070969  | 1.291566888 | 0.003738081 |
| ARHGAP5-AS | 1.43454006  | 1.113478105 | 1.848177503 | 0.005246483 |
| AC010719.1 | 1.058065608 | 0.967656986 | 1.156921148 | 0.215521592 |
| AL441992.2 | 1.099161673 | 1.02208834  | 1.182046929 | 0.010803945 |
| LINC00205  | 1.210459154 | 1.082069834 | 1.354082073 | 0.000841603 |
| TRIM52-AS1 | 1.108866522 | 1.055270217 | 1.16518494  | 4.35E-05    |
| AC064807.4 | 0.999450702 | 0.764086178 | 1.307315501 | 0.996800151 |
| AC078993.1 | 0.982586927 | 0.920152581 | 1.049257579 | 0.599967115 |
| AP000240.1 | 1.535735017 | 1.299206832 | 1.815324537 | 4.97E-07    |
| SH3BP5-AS1 | 1.170489724 | 0.95677596  | 1.431940446 | 0.125916973 |
| AC023509.3 | 1.061528414 | 0.96786026  | 1.164261641 | 0.205205925 |
| AC002456.1 | 1.089823644 | 0.976177201 | 1.216700794 | 0.125806319 |
| AC127024.5 | 1.2496272   | 1.065503769 | 1.465567916 | 0.006141645 |
| AC015912.3 | 1.177556395 | 1.082627612 | 1.280808885 | 0.00013825  |
| AC099850.4 | 1.038497459 | 0.979172597 | 1.101416619 | 0.208151696 |
| AC244090.1 | 1.016860773 | 0.994242428 | 1.03999367  | 0.145157647 |
| AC084018.1 | 1.151387517 | 0.967639091 | 1.370028585 | 0.112031758 |
| LINC01093  | 0.995305707 | 0.981284224 | 1.009527542 | 0.515681    |
| AC010531.6 | 1.247858002 | 1.032227171 | 1.508533815 | 0.022157166 |
| ZNNT1      | 1.113595068 | 1.004988754 | 1.233938161 | 0.039877934 |
| AC110285.2 | 0.987255654 | 0.936481258 | 1.04078295  | 0.633987734 |
| AL365330.1 | 1.120607178 | 0.876451342 | 1.432778281 | 0.363778986 |
| ELFN1-AS1  | 1.047630298 | 1.005355252 | 1.091683004 | 0.026821421 |
| AC008736.1 | 0.975249006 | 0.908964811 | 1.046366825 | 0.485250422 |
| AL031985.3 | 1.646094461 | 1.219497698 | 2.221920532 | 0.001127736 |
| AC109322.1 | 1.229616893 | 1.069931375 | 1.413135216 | 0.003587357 |
| AL135999.1 | 1.013169376 | 0.766323601 | 1.339528345 | 0.926830414 |
| AL365203.2 | 1.070136171 | 1.002150878 | 1.142733543 | 0.04295767  |
| LINC00997  | 1.171512314 | 0.916298393 | 1.497810223 | 0.206701282 |
| AC010280.2 | 0.959735797 | 0.879112519 | 1.047753023 | 0.358624342 |
| AC084125.4 | 1.247263513 | 0.953403454 | 1.631697748 | 0.106991637 |
| AC253536.6 | 0.984900273 | 0.9179101   | 1.056779469 | 0.672045468 |
| AC007996.1 | 1.113701098 | 0.87615262  | 1.415655341 | 0.378970341 |
| LINC02241  | 1.0169416   | 0.922324307 | 1.121265274 | 0.735993228 |
| U62317.2   | 1.082054535 | 1.040885073 | 1.124852346 | 6.76E-05    |
| HAGLR      | 1.023055856 | 0.978733604 | 1.069385256 | 0.313114248 |
| CTBP1-DT   | 1.059333238 | 0.880731454 | 1.274153323 | 0.540642808 |
| AC005696.1 | 0.946578592 | 0.776045332 | 1.154585942 | 0.588026653 |
| MAFG-DT    | 1.122809221 | 1.034411457 | 1.218761199 | 0.005629425 |
| AC015871.3 | 1.160827161 | 0.870061669 | 1.548763434 | 0.310691306 |

|             |             |             |             |             |
|-------------|-------------|-------------|-------------|-------------|
| AC023090.1  | 1.110053307 | 1.017825401 | 1.210638233 | 0.018314485 |
| AC007541.1  | 1.18809839  | 0.974495654 | 1.448521376 | 0.088293258 |
| AC064836.2  | 1.242924221 | 1.046414362 | 1.476337363 | 0.013261732 |
| AC007406.2  | 0.992520638 | 0.920958759 | 1.069643138 | 0.844116554 |
| AC095057.3  | 1.31062449  | 1.047391444 | 1.640013926 | 0.018042623 |
| LUCAT1      | 1.231653617 | 1.096240364 | 1.383793811 | 0.000454521 |
| ZFAS1       | 1.008381074 | 1.00241295  | 1.014384731 | 0.005856589 |
| SNHG30      | 1.091875867 | 1.030715551 | 1.156665298 | 0.002802476 |
| LINC01703   | 1.138847513 | 0.988784384 | 1.311685014 | 0.071308285 |
| AC004816.1  | 1.165685072 | 1.045468375 | 1.299725291 | 0.005768656 |
| AC004148.1  | 1.263907726 | 0.996364249 | 1.603291911 | 0.053613076 |
| WNT5A-AS1   | 0.96138396  | 0.778799022 | 1.186774884 | 0.714014693 |
| AC024075.2  | 1.091253445 | 0.972240598 | 1.224834762 | 0.138298997 |
| AL117379.1  | 1.311660185 | 1.025657444 | 1.677414278 | 0.030630519 |
| AC084824.5  | 1.247683532 | 1.005785384 | 1.547759812 | 0.044175119 |
| AC002398.1  | 1.206414871 | 1.060283734 | 1.372686191 | 0.004392065 |
| AC048341.2  | 1.111016513 | 0.99126504  | 1.245234767 | 0.070421271 |
| AL133353.1  | 1.118995866 | 0.941559162 | 1.329870493 | 0.201830715 |
| AC016747.1  | 1.086299689 | 0.970525981 | 1.215884003 | 0.14996659  |
| AC104958.2  | 1.008997838 | 1.000486616 | 1.017581466 | 0.038216474 |
| YTHDF3-AS1  | 1.032514442 | 0.930118795 | 1.146182701 | 0.548193389 |
| AL390728.6  | 1.052500485 | 1.022938694 | 1.082916579 | 0.00043115  |
| DSCR8       | 1.009491943 | 0.963014828 | 1.058212141 | 0.694435384 |
| LINC00623   | 1.343607794 | 1.129892186 | 1.597747047 | 0.000832869 |
| LINC01770   | 1.015411366 | 0.947067403 | 1.088687289 | 0.667055401 |
| AC090587.1  | 1.187783223 | 0.994162182 | 1.419113512 | 0.058029527 |
| BACE1-AS    | 1.182504364 | 1.08699014  | 1.286411459 | 9.58E-05    |
| AP003119.1  | 1.171959688 | 1.013151727 | 1.355660236 | 0.032692826 |
| SNHG25      | 1.021572333 | 1.00903433  | 1.03426613  | 0.000705627 |
| AC120053.1  | 1.149278477 | 1.017087291 | 1.298650595 | 0.025632761 |
| LINC00342   | 1.124871988 | 1.005362596 | 1.258587692 | 0.040044509 |
| AL603839.3  | 1.250300592 | 0.993405238 | 1.573629282 | 0.05696488  |
| AL359921.2  | 1.22575104  | 1.081114586 | 1.38973762  | 0.001486027 |
| PRANCR      | 1.344655871 | 1.060882454 | 1.704335296 | 0.014339394 |
| LINC02062   | 1.302291439 | 0.829060692 | 2.045643954 | 0.251651169 |
| ANKRD10-IT1 | 1.05561774  | 0.998211102 | 1.116325806 | 0.057800991 |
| AC011477.1  | 1.063112457 | 0.988859393 | 1.142941153 | 0.097580695 |
| AC084036.1  | 1.024876415 | 0.969719135 | 1.083171021 | 0.383992508 |
| AC083843.3  | 1.18488512  | 0.975961911 | 1.438532316 | 0.086507713 |
| AFDN-DT     | 1.300425583 | 1.011159835 | 1.672442513 | 0.040715085 |
| AC131009.3  | 1.152679045 | 1.036562139 | 1.281803503 | 0.008720537 |
| LMNTD2-AS1  | 1.080520972 | 0.923317486 | 1.264489831 | 0.334342422 |
| AC090015.1  | 1.056669326 | 0.950446832 | 1.174763307 | 0.307849321 |
| AL360181.1  | 0.98741656  | 0.945241248 | 1.031473675 | 0.569640766 |

|              |             |             |             |             |
|--------------|-------------|-------------|-------------|-------------|
| SNHG20       | 1.331988721 | 1.134556287 | 1.563777817 | 0.00046137  |
| AC092171.5   | 1.084047247 | 0.967922818 | 1.214103451 | 0.162717033 |
| LINC01270    | 0.986584941 | 0.821781078 | 1.18443935  | 0.884846708 |
| AC112206.2   | 0.981588961 | 0.915016119 | 1.053005371 | 0.604044568 |
| AL121944.2   | 1.038366381 | 0.934841179 | 1.153356062 | 0.482317613 |
| LINC01836    | 1.012371524 | 0.923765467 | 1.109476527 | 0.792465592 |
| AC055822.1   | 1.511569446 | 1.14036413  | 2.003607558 | 0.004059448 |
| AC009005.1   | 1.171179731 | 1.074283894 | 1.27681516  | 0.000335494 |
| TMEM161B-A   | 1.252440179 | 1.015725861 | 1.544320631 | 0.035208851 |
| AC010969.2   | 1.557394813 | 1.249872086 | 1.940581465 | 7.90E-05    |
| LINC01503    | 1.056676588 | 1.01808561  | 1.096730373 | 0.003681796 |
| AL132989.1   | 0.976409141 | 0.750206176 | 1.270817064 | 0.859073538 |
| LINC01124    | 0.986830568 | 0.945025436 | 1.030485034 | 0.548334236 |
| AC092171.2   | 1.051969831 | 0.986064434 | 1.122280134 | 0.124825527 |
| PXN-AS1      | 1.245491713 | 1.07035898  | 1.449279761 | 0.004519895 |
| SNHG6        | 1.006938413 | 1.003252148 | 1.010638224 | 0.000219801 |
| AC007448.4   | 1.084775044 | 0.8942453   | 1.315899447 | 0.408958725 |
| ELF3-AS1     | 1.051904004 | 0.985461481 | 1.122826266 | 0.128502377 |
| LINC01138    | 1.258674993 | 1.080402646 | 1.466363254 | 0.003153083 |
| AC010735.2   | 1.059455055 | 0.884885878 | 1.26846302  | 0.529549653 |
| COA6-AS1     | 1.101927835 | 1.032901371 | 1.175567182 | 0.003274055 |
| AC021078.1   | 1.340695442 | 1.004651384 | 1.789142281 | 0.04642756  |
| NIFK-AS1     | 1.188734444 | 0.99763587  | 1.416438223 | 0.053175419 |
| LINC01287    | 1.00330851  | 0.981820396 | 1.025266913 | 0.764921457 |
| AC026401.3   | 1.0791255   | 1.03424947  | 1.125948699 | 0.000441564 |
| TYMSOS       | 1.109949798 | 1.04612213  | 1.17767182  | 0.000556111 |
| PTOV1-AS1    | 1.203643436 | 1.017470535 | 1.423881548 | 0.03061949  |
| TMEM44-AS1   | 1.02729264  | 0.993828805 | 1.061883257 | 0.11102473  |
| UBR5-AS1     | 1.359322294 | 1.152754805 | 1.602905571 | 0.000261954 |
| PRKAR1B-AS1  | 1.071922379 | 0.953027609 | 1.205649842 | 0.246911522 |
| MALAT1       | 1.040119472 | 1.004062944 | 1.077470813 | 0.028873006 |
| SLC25A25-AS1 | 1.065715474 | 0.977900711 | 1.161415939 | 0.146883442 |
| LINC01151    | 1.014475365 | 0.973732775 | 1.056922692 | 0.491964288 |
| AC068580.1   | 1.195141117 | 1.022387999 | 1.397084365 | 0.025226143 |
| AC009065.5   | 1.343060417 | 0.96302597  | 1.873066084 | 0.082216375 |
| NUP50-DT     | 1.039278043 | 0.978517018 | 1.103812025 | 0.210053712 |
| Z95115.1     | 1.172840716 | 1.027888156 | 1.338234455 | 0.017854369 |
| AC104794.3   | 1.027353876 | 0.960761507 | 1.098561901 | 0.429961868 |
| AC008549.1   | 0.995120367 | 0.984830186 | 1.005518066 | 0.356347437 |
| SLC6A1-AS1   | 1.026362612 | 0.794379077 | 1.326092595 | 0.842221447 |
| AC007298.2   | 0.945860726 | 0.756535688 | 1.18256485  | 0.625236469 |
| DNAJC3-DT    | 1.139852717 | 0.934789289 | 1.389900624 | 0.195814736 |
| AC018904.1   | 1.047639298 | 0.970563713 | 1.130835703 | 0.232616937 |
| AL049840.6   | 1.079147731 | 1.025796321 | 1.135273934 | 0.003234684 |

|             |             |             |             |             |
|-------------|-------------|-------------|-------------|-------------|
| AC009237.15 | 1.064952163 | 0.841177436 | 1.348256696 | 0.601051751 |
| AL021807.1  | 1.257308445 | 1.040943453 | 1.51864592  | 0.017480945 |
| AC124798.1  | 1.07065026  | 0.918767247 | 1.247641319 | 0.381807964 |
| HCG18       | 1.124392183 | 0.857176475 | 1.474909563 | 0.397088807 |
| NRAV        | 1.135894038 | 1.01585698  | 1.270115075 | 0.02534854  |
| LINC02506   | 1.036357264 | 0.999657628 | 1.074404224 | 0.052215962 |
| AC040970.1  | 1.272569314 | 1.088696423 | 1.487496996 | 0.002467771 |
| PITPNA-AS1  | 1.028434255 | 0.965131684 | 1.095888815 | 0.387033781 |
| AL162582.1  | 0.981648153 | 0.943004473 | 1.021875425 | 0.366038642 |
